# Supplementary material
Source: PubMed Central journal article supplement (PMC2561937)
Supplement: mmc1.pdf [file mmc1.pdf]

## Supplemental Data

### Population-Based Genome-wide

### Association Studies Reveal Six Loci

### Influencing Plasma Levels of Liver Enzymes

Xin Yuan, Dawn Waterworth, John Perry, Noha Lim, Kijoung Song, John C. Chambers, Weihua Zhang, Peter Vollenweider, Heide Stirnadel, Toby Johnson, Sven Bergmann, Noam D. Beckmann, Luigi Ferrucci, David Melzer, Dena Hernandez, Andrew Singleton, James Scott, Paul Elliott, Gerard Waeber, Lon Cardon, Timothy M. Frayling, Jaspal S Kooner, and Vincent Mooler

**Table S1:** Characteristics of the assays used to measure plasma liver enzymes levels in the discovery and replication collections.

| Plasma Liver Enzymes | Type of assay <sup>a</sup>                                  | Maximum inter and intra-batch coefficients of variation |             |             |
|----------------------|-------------------------------------------------------------|---------------------------------------------------------|-------------|-------------|
|                      |                                                             | CoLaus                                                  | InCHIANTI   | LOLIPOP     |
| ALT                  | IFCC <sup>b</sup> kinetic method                            | 5.6% – 0.7%                                             | 4.4% – 1.6% | 3.3% – 9.3% |
| ALP                  | IFCC <sup>b</sup> automated enzymatic colorimetric method   | 3.3% – 0.7%                                             | 2.2% – 0.5% | 2.4% – 0.9% |
| GGT                  | IFCC <sup>b</sup> automated enzymatic colorimetric method C | 1.6% – 0.4%                                             | 1.3% – 1.5% | 3.7% – 0.9% |
| AST                  | IFCC <sup>b</sup> kinetic method                            | 3.6% – 1.8%                                             | 3.2% – 1.8% | 2.3% – 3.1% |

<sup>a</sup> Assays were performed with Roche Diagnostics platforms using different protocols.

<sup>b</sup> IFCC indicates International Federation of Clinical Chemistry.

**Table S2:** Associations of 74 SNPs used in the follow up studies with plasma liver enzymes levels in discovery and replication datasets.

| SNP <sup>a</sup> | CHR | Position <sup>b</sup> | Nearest gene  | Region            | Minor Allele <sup>c</sup> | Three discovery collections<br>(n=7,715)    |                          | Three replication collections<br>(n=4,704)  |                          | Six collections<br>(n=12,419)               |                          |
|------------------|-----|-----------------------|---------------|-------------------|---------------------------|---------------------------------------------|--------------------------|---------------------------------------------|--------------------------|---------------------------------------------|--------------------------|
|                  |     |                       |               |                   |                           | Pooled beta-coefficient<br>(standard error) | Combined <i>p</i> -value | Pooled beta-coefficient<br>(standard error) | Combined <i>p</i> -value | Pooled beta-coefficient<br>(standard error) | Combined <i>p</i> -value |
| <b>ALT</b>       |     |                       |               |                   |                           |                                             |                          |                                             |                          |                                             |                          |
| rs9803659        | 1   | 163888158             | <i>POU2F1</i> | INTERGENIC        | C                         | -0.034(0.008)                               | 7.25E-06                 | -0.018(0.013)                               | 0.1528                   | -0.030(0.006)                               | 4.34E-06                 |
| rs7645887        | 3   | 1364925               | <i>CNTN6</i>  | INTRONIC          | T                         | -0.044(0.010)                               | 4.09E-06                 | *                                           | *                        | *                                           | *                        |
| rs11593916       | 10  | 101799649             | <i>CPN1</i>   | INTRONIC          | A                         | -0.036(0.008)                               | 2.17E-06                 | -0.018(0.013)                               | 0.1626                   | -0.031(0.007)                               | 1.69E-06                 |
| rs11596076       | 10  | 101835424             | <i>CPN1</i>   | UPSTREAM          | C                         | 0.040(0.007)                                | 6.80E-08                 | 0.014(0.011)                                | 0.2055                   | 0.033(0.006)                                | 1.87E-07                 |
| rs7068215        | 10  | 101849860             | <i>CPN1</i>   | INTERGENIC        | G                         | 0.038(0.007)                                | 2.72E-07                 | 0.021(0.012)                                | 0.0955                   | 0.034(0.006)                                | 1.43E-07                 |
| rs11597390       | 10  | 101851425             | <i>CPN1</i>   | INTERGENIC        | A                         | -0.044(0.008)                               | 2.94E-08                 | -0.023(0.013)                               | 0.0787                   | -0.039(0.007)                               | 1.53E-08                 |
| rs2862990        | 10  | 101866354             | <i>ERLIN1</i> | INTERGENIC        | T                         | 0.042(0.008)                                | 2.99E-08                 | 0.021(0.012)                                | 0.0766                   | 0.036(0.006)                                | 2.06E-08                 |
| rs7913374        | 10  | 101869676             | <i>ERLIN1</i> | INTERGENIC        | G                         | 0.042(0.008)                                | 2.95E-08                 | 0.021(0.012)                                | 0.0694                   | 0.036(0.006)                                | 1.72E-08                 |
| rs11594333       | 10  | 101870690             | <i>ERLIN1</i> | INTERGENIC        | T                         | 0.040(0.007)                                | 8.21E-08                 | 0.021(0.012)                                | 0.0766                   | 0.034(0.006)                                | 4.60E-08                 |
| rs2862954        | 10  | 101902054             | <i>ERLIN1</i> | NON<br>SYNONYMOUS | T                         | -0.036(0.008)                               | 2.44E-06                 | -0.030(0.012)                               | 0.0107                   | -0.034(0.006)                               | 9.24E-08                 |
| rs11597086       | 10  | 101943695             | <i>CHUK</i>   | INTRONIC          | C                         | -0.038(0.007)                               | 3.64E-07                 | -0.030(0.012)                               | 0.0135                   | -0.036(0.006)                               | 1.83E-08                 |
| rs11591741       | 10  | 101966491             | <i>CHUK</i>   | INTRONIC          | C                         | -0.038(0.007)                               | 4.50E-07                 | -0.029(0.012)                               | 0.0175                   | -0.035(0.006)                               | 2.97E-08                 |
| rs1851134        | 15  | 35497700              | <i>MEIS2</i>  | INTERGENIC        | C                         | 0.036(0.008)                                | 7.34E-06                 | *                                           | *                        | *                                           | *                        |
| rs17542178       | 15  | 35499068              | <i>MEIS2</i>  | INTERGENIC        | A                         | -0.036(0.008)                               | 5.17E-06                 | *                                           | *                        | *                                           | *                        |
| rs4911389        | 20  | 32028702              | <i>RALY</i>   | INTERGENIC        | A                         | -0.036(0.008)                               | 7.77E-06                 | -0.003(0.012)                               | 0.7984                   | -0.026(0.007)                               | 9.50E-05                 |
| rs4911146        | 20  | 32103708              | <i>RALY</i>   | INTRONIC          | C                         | -0.037(0.008)                               | 4.90E-06                 | -0.004(0.012)                               | 0.7613                   | -0.027(0.007)                               | 6.13E-05                 |
| rs2284387        | 20  | 32108249              | <i>RALY</i>   | INTRONIC          | G                         | 0.036(0.008)                                | 6.11E-06                 | *                                           | *                        | *                                           | *                        |
| rs12329791       | 21  | 38568505              | <i>KCNJ15</i> | INTRONIC          | T                         | 0.044(0.009)                                | 3.60E-06                 | *                                           | *                        | *                                           | *                        |
| rs2836285        | 21  | 38578375              | <i>KCNJ15</i> | INTRONIC          | C                         | -0.045(0.009)                               | 1.50E-06                 | -0.005(0.011)                               | 0.6312                   | -0.029(0.007)                               | 6.26E-05                 |
| rs2076211        | 22  | 42653979              | <i>PNPLA3</i> | INTRONIC          | A                         | -0.065(0.010)                               | 2.45E-11                 | -0.065(0.012)                               | 1.59E-05                 | -0.059(0.007)                               | 2.76E-15                 |
| rs2281135        | 22  | 42657471              | <i>PNPLA3</i> | INTRONIC          | T                         | 0.065(0.010)                                | 8.21E-12                 | 0.051(0.012)                                | 1.34E-05                 | 0.060(0.007)                                | 8.42E-16                 |
| rs2073081        | 22  | 42660645              | <i>PNPLA3</i> | INTRONIC          | C                         | 0.066(0.010)                                | 2.02E-11                 | 0.051(0.012)                                | 5.24E-05                 | 0.060(0.008)                                | 8.30E-15                 |
| rs2281298        | 22  | 42716135              | <i>SAMM50</i> | INTRONIC          | A                         | 0.044(0.010)                                | 4.98E-06                 | 0.038(0.012)                                | 0.0017                   | 0.042(0.008)                                | 3.28E-08                 |
| rs2143571        | 22  | 42716587              | <i>SAMM50</i> | INTRONIC          | A                         | 0.046(0.009)                                | 9.37E-07                 | 0.038(0.012)                                | 0.0018                   | 0.043(0.007)                                | 7.15E-09                 |

| GGT        |    |           |                   |            |   |               |          |               |          |               |          |
|------------|----|-----------|-------------------|------------|---|---------------|----------|---------------|----------|---------------|----------|
| rs11129542 | 3  | 33077468  | <i>GLB1</i>       | INTRONIC   | T | -0.009(0.002) | 9.45E-06 | *             | *        | *             | *        |
| rs7953249  | 12 | 119866444 | <i>C12orf27</i>   | INTERGENIC | G | 0.007(0.001)  | 1.44E-08 | 0.002(0.001)  | 0.0066   | 0.004(0.001)  | 5.05E-08 |
| rs2393791  | 12 | 119886676 | <i>HNF1A</i>      | INTRONIC   | G | 0.007(0.001)  | 1.78E-08 | 0.004(0.001)  | 0.0022   | 0.006(0.001)  | 7.58E-10 |
| rs2259816  | 12 | 119898307 | <i>HNF1A</i>      | SYNONYMOUS | A | 0.007(0.001)  | 3.26E-08 | 0.003(0.001)  | 7.00E-05 | 0.005(0.001)  | 1.79E-10 |
| rs1169313  | 12 | 119905390 | <i>C12orf43</i>   | INTRONIC   | C | -0.007(0.001) | 3.18E-08 | -0.003(0.001) | 7.00E-05 | -0.005(0.001) | 1.77E-10 |
| rs2258287  | 12 | 119917033 | <i>C12orf43</i>   | UPSTREAM   | G | -0.007(0.001) | 1.46E-07 | -0.002(0.001) | 0.009    | -0.004(0.001) | 2.82E-07 |
| rs5760485  | 22 | 23311027  | <i>C22orf36</i>   | INTRONIC   | C | 0.006(0.001)  | 9.38E-06 | 0.007(0.002)  | 4.24E-06 | 0.007(0.001)  | 2.17E-10 |
| rs4820599  | 22 | 23314767  | <i>GGT1</i>       | INTRONIC   | G | 0.006(0.001)  | 3.94E-06 | 0.008(0.002)  | 1.75E-06 | 0.007(0.001)  | 3.98E-11 |
| ALP        |    |           |                   |            |   |               |          |               |          |               |          |
| rs4654947  | 1  | 21550354  | <i>NBPF3</i>      | INTRONIC   | C | 0.025(0.006)  | 2.56E-05 | 0.043(0.016)  | 0.0069   | 0.027(0.006)  | 1.00E-06 |
| rs10799701 | 1  | 21566296  | <i>NBPF3</i>      | INTERGENIC | A | 0.031(0.005)  | 1.88E-10 | 0.032(0.008)  | 4.22E-05 | 0.031(0.004)  | 3.64E-14 |
| rs1780324  | 1  | 21567063  | <i>NBPF3</i>      | INTERGENIC | T | 0.032(0.005)  | 1.44E-10 | 0.031(0.007)  | 1.02E-05 | 0.031(0.004)  | 7.03E-15 |
| rs3738097  | 1  | 21640122  | <i>ALPL</i>       | INTRONIC   | G | -0.034(0.008) | 2.11E-05 | -0.045(0.019) | 0.0175   | -0.035(0.007) | 1.29E-06 |
| rs3738095  | 1  | 21640301  | <i>ALPL</i>       | INTRONIC   | G | -0.033(0.008) | 3.92E-05 | -0.045(0.019) | 0.0162   | -0.034(0.007) | 2.34E-06 |
| rs3767145  | 1  | 21641108  | <i>ALPL</i>       | INTRONIC   | G | 0.033(0.008)  | 3.92E-05 | 0.045(0.019)  | 0.0162   | 0.035(0.007)  | 2.29E-06 |
| rs2275369  | 1  | 21645750  | <i>ALPL</i>       | INTRONIC   | G | 0.035(0.008)  | 1.24E-05 | 0.046(0.019)  | 0.015    | 0.036(0.007)  | 6.65E-07 |
| rs829370   | 1  | 21678499  | <i>RAP1GAP</i>    | INTRONIC   | C | 0.041(0.009)  | 1.70E-06 | 0.035(0.012)  | 0.0049   | 0.039(0.007)  | 3.11E-08 |
| rs9295624  | 6  | 24547579  | <i>GPLD1</i>      | INTRONIC   | A | 0.031(0.006)  | 1.76E-07 | 0.031(0.009)  | 0.0007   | 0.031(0.005)  | 4.88E-10 |
| rs9461011  | 6  | 24548330  | <i>GPLD1</i>      | INTRONIC   | G | 0.033(0.006)  | 4.42E-08 | 0.030(0.009)  | 0.0011   | 0.032(0.005)  | 1.88E-10 |
| rs9379660  | 6  | 24549614  | <i>GPLD1</i>      | INTRONIC   | C | 0.027(0.005)  | 1.86E-07 | 0.017(0.007)  | 0.0124   | 0.023(0.004)  | 1.35E-08 |
| rs9467160  | 6  | 24549725  | <i>GPLD1</i>      | INTRONIC   | A | 0.033(0.006)  | 2.19E-08 | 0.035(0.009)  | 0.0001   | 0.034(0.005)  | 1.17E-11 |
| rs9461012  | 6  | 24549823  | <i>GPLD1</i>      | INTRONIC   | A | 0.034(0.006)  | 1.36E-08 | 0.030(0.009)  | 0.0009   | 0.033(0.005)  | 4.98E-11 |
| rs17247566 | 6  | 24558383  | <i>GPLD1</i>      | INTRONIC   | T | 0.028(0.006)  | 1.70E-06 | 0.027(0.008)  | 0.0016   | 0.027(0.005)  | 9.59E-09 |
| rs9467176  | 6  | 24572886  | <i>GPLD1</i>      | INTRONIC   | A | -0.033(0.007) | 3.57E-06 | *             | *        | *             | *        |
| rs6901703  | 6  | 24583279  | <i>GPLD1</i>      | INTRONIC   | A | 0.034(0.007)  | 1.57E-06 | *             | *        | *             | *        |
| rs2504824  | 6  | 40421434  | <i>NP_0010017</i> | INTRONIC   | A | -0.056(0.011) | 2.58E-07 | 0.002(0.018)  | 0.9037   | -0.040(0.009) | 1.33E-05 |
| rs16868911 | 6  | 40425447  | <i>NP_0010017</i> | INTRONIC   | A | 0.054(0.011)  | 6.00E-07 | *             | *        | *             | *        |
| rs2477757  | 6  | 40429756  | <i>NP_0010017</i> | 5PRIME_UTR | T | 0.052(0.011)  | 1.55E-06 | *             | *        | *             | *        |
| rs6558648  | 8  | 2277246   | <i>MYOM2</i>      | INTERGENIC | G | 0.022(0.005)  | 7.89E-06 | 0.005(0.009)  | 0.5471   | 0.018(0.004)  | 2.68E-05 |
| rs6981064  | 8  | 2277300   | <i>MYOM2</i>      | INTERGENIC | A | 0.022(0.005)  | 7.39E-06 | 0.005(0.009)  | 0.5471   | 0.018(0.004)  | 2.51E-05 |
| rs897445   | 8  | 2283162   | <i>MYOM2</i>      | INTERGENIC | A | 0.025(0.005)  | 9.33E-07 | 0.002(0.008)  | 0.776    | 0.018(0.004)  | 1.52E-05 |

The American Journal of Human Genetics, Volume 83

|            |    |           |          |            |   |               |          |               |          |               |          |
|------------|----|-----------|----------|------------|---|---------------|----------|---------------|----------|---------------|----------|
| rs10866938 | 8  | 2310221   | MYOM2    | INTERGENIC | T | 0.024(0.005)  | 4.41E-06 | 0.001(0.008)  | 0.9482   | 0.017(0.004)  | 8.76E-05 |
| rs8176720  | 9  | 133162427 | ABO      | SYNONYMOUS | G | 0.031(0.005)  | 1.41E-08 | 0.031(0.008)  | 7.00E-05 | 0.031(0.004)  | 4.29E-12 |
| rs641959   | 9  | 133163253 | ABO      | INTRONIC   | G | 0.035(0.006)  | 6.83E-10 | 0.024(0.008)  | 0.0044   | 0.031(0.005)  | 2.05E-11 |
| rs514708   | 9  | 133163297 | ABO      | INTRONIC   | T | 0.035(0.006)  | 6.15E-10 | 0.024(0.008)  | 0.0044   | 0.031(0.005)  | 1.85E-11 |
| rs672316   | 9  | 133167679 | ABO      | INTRONIC   | C | 0.032(0.006)  | 1.40E-08 | 0.023(0.008)  | 0.0057   | 0.029(0.005)  | 4.42E-10 |
| rs657152   | 9  | 133168819 | ABO      | INTRONIC   | T | -0.057(0.005) | 4.56E-29 | -0.029(0.007) | 4.85E-05 | -0.047(0.004) | 1.73E-30 |
| rs474279   | 9  | 133169171 | ABO      | INTRONIC   | T | 0.030(0.006)  | 3.39E-07 | 0.023(0.008)  | 0.0057   | 0.028(0.005)  | 8.29E-09 |
| rs8176681  | 9  | 133169308 | ABO      | INTRONIC   | G | 0.035(0.005)  | 3.68E-12 | *             | *        | *             | *        |
| rs552148   | 9  | 133183035 | ABO      | UPSTREAM   | T | 0.032(0.006)  | 3.06E-08 | 0.022(0.008)  | 0.0076   | 0.029(0.005)  | 1.24E-09 |
| rs652600   | 9  | 133340571 | ADAMTS13 | INTRONIC   | C | -0.027(0.006) | 1.11E-06 | -0.011(0.011) | 0.2873   | -0.024(0.005) | 1.59E-06 |
| rs4962153  | 9  | 133353308 | ADAMTS13 | INTRONIC   | A | -0.059(0.007) | 2.17E-18 | -0.064(0.019) | 0.0009   | -0.060(0.006) | 8.19E-21 |
| rs3124765  | 9  | 133358211 | C9orf7   | SYNONYMOUS | A | 0.063(0.007)  | 7.65E-19 | *             | *        | *             | *        |
| rs10761739 | 10 | 64732014  | JMJD1C   | INTRONIC   | C | 0.023(0.005)  | 5.48E-06 | 0.024(0.008)  | 0.0013   | 0.023(0.004)  | 2.69E-08 |
| rs10761741 | 10 | 64736192  | JMJD1C   | INTRONIC   | A | -0.022(0.005) | 9.06E-06 | -0.024(0.008) | 0.0014   | -0.023(0.004) | 4.70E-08 |
| rs10740118 | 10 | 64771213  | JMJD1C   | INTRONIC   | C | 0.022(0.005)  | 7.82E-06 | 0.024(0.007)  | 0.0012   | 0.023(0.004)  | 3.53E-08 |
| rs12355784 | 10 | 64791571  | JMJD1C   | INTRONIC   | A | 0.026(0.005)  | 4.68E-07 | 0.025(0.007)  | 0.0003   | 0.025(0.004)  | 5.02E-10 |
| rs3999089  | 10 | 64873814  | JMJD1C   | INTRONIC   | C | -0.024(0.005) | 1.28E-06 | -0.023(0.007) | 0.0005   | -0.024(0.004) | 2.55E-09 |
| rs10761779 | 10 | 64944933  | REEP3    | INTERGENIC | G | 0.025(0.005)  | 3.86E-07 | 0.024(0.007)  | 0.0004   | 0.025(0.004)  | 6.89E-10 |
| rs281408   | 19 | 53925218  | RASIP1   | INTRONIC   | A | 0.027(0.005)  | 7.12E-08 | 0.004(0.007)  | 0.6266   | 0.020(0.004)  | 2.05E-06 |
| rs12975781 | 19 | 53941510  | IZUMO1   | 5PRIME_UTR | T | -0.029(0.005) | 7.50E-09 | *             | *        | *             | *        |

<sup>a</sup> Position and minor allele are of NCBI Build 35

<sup>b</sup> Minor allele corresponds to forward strand

<sup>c</sup> MAF: Minor allele frequency. It is based on CoLaus stud

\* Empty cells indicate those SNPs were removed from follow up meta analysis, due to either lack of imputation, low quality of imputation or inconsistent direction of effects.

**Table S3:** List of 32 SNPs associated with plasma liver enzymes levels with genome-wide significance in combined analysis of discovery and replication datasets

| SNP <sup>a</sup> | CHR | Position <sup>b</sup> | Nearest gene          | Region     | Minor Allele <sup>c</sup> | MAF <sup>b</sup> | Three discovery collections (n=7,715)    |                          | Three replication collections (n=4,704)  |                          | Six collections (n=12,419)               |                          |
|------------------|-----|-----------------------|-----------------------|------------|---------------------------|------------------|------------------------------------------|--------------------------|------------------------------------------|--------------------------|------------------------------------------|--------------------------|
|                  |     |                       |                       |            |                           |                  | Pooled beta-coefficient (standard error) | Combined <i>p</i> -value | Pooled beta-coefficient (standard error) | Combined <i>p</i> -value | Pooled beta-coefficient (standard error) | Combined <i>p</i> -value |
| <b>ALT</b>       |     |                       |                       |            |                           |                  |                                          |                          |                                          |                          |                                          |                          |
| rs11597390       | 10  | 101851425             | <i>CPN1</i>           | INTERGENIC | A                         | 0.36             | -0.044(0.008)                            | 2.9 × 10 <sup>-8</sup>   | -0.023(0.013)                            | 0.08                     | -0.039(0.007)                            | 1.5 × 10 <sup>-8</sup>   |
| rs2862990        | 10  | 101866354             | <i>ERLIN1</i>         | INTERGENIC | T                         | 0.42             | 0.042(0.008)                             | 3.0 × 10 <sup>-8</sup>   | 0.021(0.011)                             | 0.08                     | 0.036(0.006)                             | 2.1 × 10 <sup>-8</sup>   |
| rs7913374        | 10  | 101869676             | <i>ERLIN1</i>         | INTERGENIC | G                         | 0.41             | 0.042(0.008)                             | 3.0 × 10 <sup>-8</sup>   | 0.021(0.012)                             | 0.07                     | 0.036(0.006)                             | 1.7 × 10 <sup>-8</sup>   |
| rs11594333       | 10  | 101870690             | <i>ERLIN1</i>         | INTERGENIC | T                         | 0.43             | 0.040(0.007)                             | 8.2 × 10 <sup>-8</sup>   | 0.021(0.012)                             | 0.08                     | 0.034(0.006)                             | 4.6 × 10 <sup>-8</sup>   |
| rs11597086       | 10  | 101943695             | <i>CHUK</i>           | INTRONIC   | C                         | 0.43             | -0.038(0.007)                            | 3.6 × 10 <sup>-7</sup>   | -0.030(0.012)                            | 0.01                     | -0.036(0.006)                            | 1.8 × 10 <sup>-8</sup>   |
| rs11591741       | 10  | 101966491             | <i>CHUK</i>           | INTRONIC   | C                         | 0.43             | -0.038(0.007)                            | 4.5 × 10 <sup>-7</sup>   | -0.029(0.012)                            | 0.02                     | -0.035(0.006)                            | 3.0 × 10 <sup>-8</sup>   |
| rs2076211        | 22  | 42653979              | <i>PNPLA3</i>         | INTRONIC   | A                         | 0.18             | -0.065(0.010)                            | 2.5 × 10 <sup>-11</sup>  | -0.065(0.010)                            | 1.6 × 10 <sup>-5</sup>   | -0.059(0.007)                            | 2.8 × 10 <sup>-15</sup>  |
| rs2281135        | 22  | 42657471              | <i>PNPLA3</i>         | INTRONIC   | T                         | 0.18             | 0.065(0.010)                             | 8.2 × 10 <sup>-12</sup>  | 0.051(0.012)                             | 1.3 × 10 <sup>-5</sup>   | 0.060(0.007)                             | 8.4 × 10 <sup>-16</sup>  |
| rs2073081        | 22  | 42660645              | <i>PNPLA3</i>         | INTRONIC   | C                         | 0.18             | 0.066(0.010)                             | 2.0 × 10 <sup>-11</sup>  | 0.051(0.012)                             | 5.2 × 10 <sup>-5</sup>   | 0.060(0.008)                             | 8.3 × 10 <sup>-15</sup>  |
| rs2143571        | 22  | 42716587              | <i>SAMM50</i>         | INTRONIC   | A                         | 0.19             | 0.046(0.009)                             | 9.4 × 10 <sup>-7</sup>   | 0.038(0.012)                             | 1.8 × 10 <sup>-3</sup>   | 0.043(0.007)                             | 7.2 × 10 <sup>-9</sup>   |
| <b>GGT</b>       |     |                       |                       |            |                           |                  |                                          |                          |                                          |                          |                                          |                          |
| rs7953249        | 12  | 119866444             | <i>C12orf27</i>       | INTERGENIC | G                         | 0.43             | 0.007(0.001)                             | 1.4 × 10 <sup>-8</sup>   | 0.002(0.001)                             | 0.007                    | 0.004(0.001)                             | 5.1 × 10 <sup>-8</sup>   |
| rs2393791        | 12  | 119886676             | <i>HNF1A</i>          | INTRONIC   | G                         | 0.40             | 0.007(0.001)                             | 1.8 × 10 <sup>-8</sup>   | 0.004(0.001)                             | 0.002                    | 0.006(0.001)                             | 7.6 × 10 <sup>-10</sup>  |
| rs2259816        | 12  | 119898307             | <i>HNF1A</i>          | SYNONYMOUS | A                         | 0.37             | 0.007(0.001)                             | 3.3 × 10 <sup>-8</sup>   | 0.003(0.001)                             | 7.0 × 10 <sup>-5</sup>   | 0.005(0.001)                             | 1.8 × 10 <sup>-10</sup>  |
| rs1169313        | 12  | 119905390             | <i>HNF1A-C12orf43</i> | INTRONIC   | C                         | 0.38             | -0.007(0.001)                            | 3.2 × 10 <sup>-8</sup>   | -0.003(0.001)                            | 7.0 × 10 <sup>-5</sup>   | -0.005(0.001)                            | 1.8 × 10 <sup>-10</sup>  |
| rs5760485        | 22  | 23311027              | <i>C22orf36</i>       | INTRONIC   | C                         | 0.31             | 0.006(0.001)                             | 9.4 × 10 <sup>-6</sup>   | 0.007(0.002)                             | 4.2 × 10 <sup>-6</sup>   | 0.007(0.001)                             | 2.2 × 10 <sup>-10</sup>  |
| rs4820599        | 22  | 23314767              | <i>GGT1</i>           | INTRONIC   | G                         | 0.31             | 0.006(0.001)                             | 3.9 × 10 <sup>-6</sup>   | 0.008(0.002)                             | 1.8 × 10 <sup>-6</sup>   | 0.007(0.001)                             | 4.0 × 10 <sup>-11</sup>  |
| <b>ALP</b>       |     |                       |                       |            |                           |                  |                                          |                          |                                          |                          |                                          |                          |
| rs10799701       | 1   | 21566296              | <i>NBPF3-ALPL</i>     | INTERGENIC | A                         | 0.43             | 0.031(0.005)                             | 1.9 × 10 <sup>-10</sup>  | 0.032(0.008)                             | 4.2 × 10 <sup>-5</sup>   | 0.031(0.004)                             | 3.6 × 10 <sup>-14</sup>  |
| rs1780324        | 1   | 21567063              | <i>NBPF3-ALPL</i>     | INTERGENIC | T                         | 0.43             | 0.032(0.005)                             | 1.4 × 10 <sup>-10</sup>  | 0.031(0.007)                             | 1.0 × 10 <sup>-5</sup>   | 0.031(0.004)                             | 7.0 × 10 <sup>-15</sup>  |
| rs9295624        | 6   | 24547579              | <i>GPLD1</i>          | INTRONIC   | A                         | 0.23             | 0.031(0.006)                             | 1.8 × 10 <sup>-7</sup>   | 0.031(0.009)                             | 7.2 × 10 <sup>-4</sup>   | 0.031(0.005)                             | 4.9 × 10 <sup>-10</sup>  |

The American Journal of Human Genetics, Volume 83

|            |    |           |               |            |   |      |               |                       |               |                      |               |                       |
|------------|----|-----------|---------------|------------|---|------|---------------|-----------------------|---------------|----------------------|---------------|-----------------------|
| rs9461011  | 6  | 24548330  | <i>GPLD1</i>  | INTRONIC   | G | 0.23 | 0.033(0.006)  | $4.4 \times 10^{-8}$  | 0.030(0.009)  | 0.001                | 0.032(0.005)  | $1.9 \times 10^{-10}$ |
| rs9467160  | 6  | 24549725  | <i>GPLD1</i>  | INTRONIC   | A | 0.24 | 0.033(0.006)  | $2.2 \times 10^{-8}$  | 0.035(0.009)  | $1.3 \times 10^{-4}$ | 0.034(0.005)  | $1.2 \times 10^{-11}$ |
| rs9461012  | 6  | 24549823  | <i>GPLD1</i>  | INTRONIC   | A | 0.23 | 0.034(0.006)  | $1.4 \times 10^{-8}$  | 0.030(0.009)  | $8.6 \times 10^{-4}$ | 0.033(0.005)  | $5.0 \times 10^{-11}$ |
| rs17247566 | 6  | 24558383  | <i>GPLD1</i>  | INTRONIC   | T | 0.25 | 0.028(0.006)  | $1.7 \times 10^{-6}$  | 0.027(0.008)  | 0.002                | 0.027(0.005)  | $9.6 \times 10^{-9}$  |
| rs8176720  | 9  | 133162427 | <i>ABO</i>    | SYNONYMOUS | G | 0.32 | 0.031(0.005)  | $1.4 \times 10^{-8}$  | 0.031(0.008)  | $7.0 \times 10^{-5}$ | 0.031(0.004)  | $4.3 \times 10^{-12}$ |
| rs641959   | 9  | 133163253 | <i>ABO</i>    | INTRONIC   | G | 0.26 | 0.035(0.006)  | $6.8 \times 10^{-10}$ | 0.024(0.008)  | 0.004                | 0.031(0.005)  | $2.1 \times 10^{-11}$ |
| rs514708   | 9  | 133163297 | <i>ABO</i>    | INTRONIC   | T | 0.26 | 0.035(0.006)  | $6.2 \times 10^{-10}$ | 0.024(0.008)  | 0.004                | 0.031(0.005)  | $1.9 \times 10^{-11}$ |
| rs672316   | 9  | 133167679 | <i>ABO</i>    | INTRONIC   | C | 0.27 | 0.032(0.006)  | $1.4 \times 10^{-8}$  | 0.023(0.008)  | 0.006                | 0.029(0.005)  | $4.4 \times 10^{-10}$ |
| rs657152   | 9  | 133168819 | <i>ABO</i>    | INTRONIC   | T | 0.39 | -0.057(0.005) | $4.6 \times 10^{-29}$ | -0.029(0.007) | $4.9 \times 10^{-5}$ | -0.047(0.004) | $1.7 \times 10^{-30}$ |
| rs474279   | 9  | 133169171 | <i>ABO</i>    | INTRONIC   | T | 0.24 | 0.030(0.006)  | $3.4 \times 10^{-7}$  | 0.023(0.008)  | 0.006                | 0.028(0.005)  | $8.3 \times 10^{-9}$  |
| rs552148   | 9  | 133183035 | <i>ABO</i>    | UPSTREAM   | T | 0.24 | 0.032(0.006)  | $3.1 \times 10^{-8}$  | 0.022(0.008)  | 0.008                | 0.029(0.005)  | $1.2 \times 10^{-9}$  |
| rs12355784 | 10 | 64791571  | <i>JMJD1C</i> | INTRONIC   | A | 0.48 | 0.026(0.005)  | $4.7 \times 10^{-7}$  | 0.025(0.007)  | $2.7 \times 10^{-4}$ | 0.025(0.004)  | $5.0 \times 10^{-10}$ |
| rs10761779 | 10 | 64944933  | <i>REEP3</i>  | INTERGENIC | G | 0.49 | 0.025(0.005)  | $3.9 \times 10^{-7}$  | 0.024(0.007)  | $4.5 \times 10^{-4}$ | 0.025(0.004)  | $6.9 \times 10^{-10}$ |

<sup>a</sup> Position and minor allele are of NCBI Build 35

<sup>b</sup> Minor allele corresponds to forward strand

<sup>c</sup> MAF: Minor allele frequency. It is based on CoLaus study

**Table S4:** Minor allele frequency, proportion of variance and heterogeneity for 32 SNPs associated with plasma liver enzymes levels across discovery and replication datasets.

| SNP        | CHR | Nearest gene          | Minor Allele | Proportion of Variance for the trait | p-val for heterogeneity | MAF            |         |           |                         |                         |                         |
|------------|-----|-----------------------|--------------|--------------------------------------|-------------------------|----------------|---------|-----------|-------------------------|-------------------------|-------------------------|
|            |     |                       |              |                                      |                         | Discovery Sets |         |           | Replication Sets        |                         |                         |
|            |     |                       |              |                                      |                         | ALT            | CoLaus  | LOLIPOP   | InCHIANTI               | Indian Asian (Illumina) | Indian Asian (Perlegen) |
| rs11597390 | 10  | <i>CPN1</i>           | A            | 0.3                                  | 0.748                   | 0.38           | 0.36    | 0.41      | 0.15                    | 0.17                    | 0.37                    |
| rs2862990  | 10  | <i>ERLIN1</i>         | T            | 0.3                                  | 0.723                   | 0.42           | 0.40    | 0.46      | 0.23                    | 0.23                    | 0.40                    |
| rs7913374  | 10  | <i>ERLIN1</i>         | G            | 0.3                                  | 0.771                   | 0.41           | 0.39    | 0.46      | 0.23                    | 0.23                    | 0.40                    |
| rs11594333 | 10  | <i>ERLIN1</i>         | T            | 0.3                                  | 0.791                   | 0.43           | 0.41    | 0.46      | 0.23                    | 0.23                    | 0.40                    |
| rs11597086 | 10  | <i>CHUK</i>           | C            | 0.2                                  | 0.821                   | 0.43           | 0.42    | 0.44      | 0.17                    | 0.17                    | 0.37                    |
| rs11591741 | 10  | <i>CHUK</i>           | C            | 0.2                                  | 0.732                   | 0.43           | 0.42    | 0.46      | 0.16                    | 0.17                    | 0.44                    |
| rs2076211  | 22  | <i>PNPLA3</i>         | A            | 0.4                                  | 0.273                   | 0.18           | 0.14    | 0.18      | 0.20                    | 0.21                    | 0.37                    |
| rs2281135  | 22  | <i>PNPLA3</i>         | T            | 0.4                                  | 0.392                   | 0.18           | 0.15    | 0.19      | 0.21                    | 0.21                    | 0.19                    |
| rs2073081  | 22  | <i>PNPLA3</i>         | C            | 0.4                                  | 0.449                   | 0.18           | 0.15    | 0.19      | 0.21                    | 0.21                    | 0.18                    |
| rs2143571  | 22  | <i>SAMM50</i>         | A            | 0.2                                  | 0.341                   | 0.19           | 0.18    | 0.20      | 0.19                    | 0.24                    | 0.19                    |
| GGT        |     |                       |              |                                      |                         | CoLaus         | LOLIPOP | InCHIANTI | Indian Asian (Illumina) | Indian Asian (Perlegen) | Caucasian (Perlegen)    |
| rs7953249  | 12  | <i>C12orf27</i>       | G            | 0.6                                  | 0.003                   | 0.43           | 0.41    | 0.47      | 0.55                    | 0.49                    | 0.41                    |
| rs2393791  | 12  | <i>HNF1A</i>          | G            | 0.6                                  | 0.146                   | 0.40           | 0.38    | 0.45      | 0.51                    | 0.48                    | 0.38                    |
| rs2259816  | 12  | <i>HNF1A</i>          | A            | 0.4                                  | 0.014                   | 0.37           | 0.36    | 0.42      | 0.50                    | 0.45                    | 0.36                    |
| rs1169313  | 12  | <i>HNF1A-C12orf43</i> | C            | 0.4                                  | 0.014                   | 0.38           | 0.36    | 0.42      | 0.49                    | 0.55                    | 0.36                    |
| rs5760485  | 22  | <i>C22orf36</i>       | C            | 0.4                                  | 0.197                   | 0.31           | 0.30    | 0.30      | 0.36                    | 0.29                    | 0.32                    |
| rs4820599  | 22  | <i>GGT1</i>           | G            | 0.4                                  | 0.266                   | 0.31           | 0.30    | 0.30      | 0.36                    | 0.29                    | 0.32                    |
| ALP        |     |                       |              |                                      |                         | CoLaus         | LOLIPOP | InCHIANTI | Indian Asian (Illumina) | Indian Asian (Perlegen) | Caucasian (Perlegen)    |
| rs10799701 | 1   | <i>NBPF3-ALPL</i>     | A            | 0.6                                  | 0.766                   | 0.43           | 0.46    | 0.45      | 0.49                    | 0.45                    | 0.46                    |
| rs1780324  | 1   | <i>NBPF3-ALPL</i>     | T            | 0.6                                  | 0.789                   | 0.43           | 0.46    | 0.45      | 0.48                    | 0.43                    | 0.46                    |
| rs9295624  | 6   | <i>GPLD1</i>          | A            | 0.4                                  | 0.341                   | 0.23           | 0.26    | 0.18      | 0.18                    | 0.18                    | 0.25                    |
| rs9461011  | 6   | <i>GPLD1</i>          | G            | 0.4                                  | 0.355                   | 0.23           | 0.26    | 0.18      | 0.18                    | 0.18                    | 0.25                    |
| rs9467160  | 6   | <i>GPLD1</i>          | A            | 0.5                                  | 0.580                   | 0.24           | 0.28    | 0.19      | 0.20                    | 0.21                    | 0.27                    |
| rs9461012  | 6   | <i>GPLD1</i>          | A            | 0.4                                  | 0.342                   | 0.23           | 0.26    | 0.18      | 0.18                    | 0.18                    | 0.25                    |
| rs17247566 | 6   | <i>GPLD1</i>          | T            | 0.3                                  | 0.620                   | 0.25           | 0.29    | 0.20      | 0.21                    | 0.20                    | 0.28                    |
| rs8176720  | 9   | <i>ABO</i>            | G            | 0.5                                  | 0.859                   | 0.32           | 0.33    | 0.33      | 0.49                    | 0.44                    | 0.32                    |
| rs641959   | 9   | <i>ABO</i>            | G            | 0.5                                  | 0.888                   | 0.26           | 0.27    | 0.26      | 0.23                    | 0.23                    | 0.26                    |
| rs514708   | 9   | <i>ABO</i>            | T            | 0.5                                  | 0.898                   | 0.26           | 0.27    | 0.26      | 0.23                    | 0.23                    | 0.26                    |
| rs672316   | 9   | <i>ABO</i>            | C            | 0.4                                  | 0.958                   | 0.27           | 0.28    | 0.26      | 0.22                    | 0.22                    | 0.25                    |
| rs657152   | 9   | <i>ABO</i>            | T            | 2.0                                  | 0.010                   | 0.39           | 0.34    | 0.38      | 0.50                    | 0.42                    | 0.36                    |
| rs474279   | 9   | <i>ABO</i>            | T            | 0.3                                  | 0.938                   | 0.24           | 0.25    | 0.23      | 0.21                    | 0.22                    | 0.23                    |
| rs552148   | 9   | <i>ABO</i>            | T            | 0.4                                  | 0.900                   | 0.24           | 0.25    | 0.24      | 0.21                    | 0.21                    | 0.23                    |
| rs12355784 | 10  | <i>JMJD1C</i>         | A            | 0.4                                  | 0.575                   | 0.48           | 0.44    | 0.47      | 0.52                    | 0.54                    | 0.49                    |
| rs10761779 | 10  | <i>REEP3</i>          | G            | 0.4                                  | 0.700                   | 0.49           | 0.47    | 0.48      | 0.52                    | 0.54                    | 0.49                    |

**Figure S1.** Genomic context plot (using WGAviewer<sup>41</sup>, Hapmap build36) for ALT signal at *CPN1-CHUK* region on chromosome 10 identified through genotyping and imputation from meta-analysis of three discovery datasets. Panel **A**: Ideogram of chromosome 10; Panel **B**:  $-\log_{10} p$ -values for imputed SNPs. SNPs with  $p$ -value  $\leq 1 \times 10^{-8}$  are in red; Panel **C**:  $-\log_{10} p$ -values for Affymetrix genotyped SNPs; Panel **D**: Known genes track in the region. Panel **E**: LD plot in CEU.

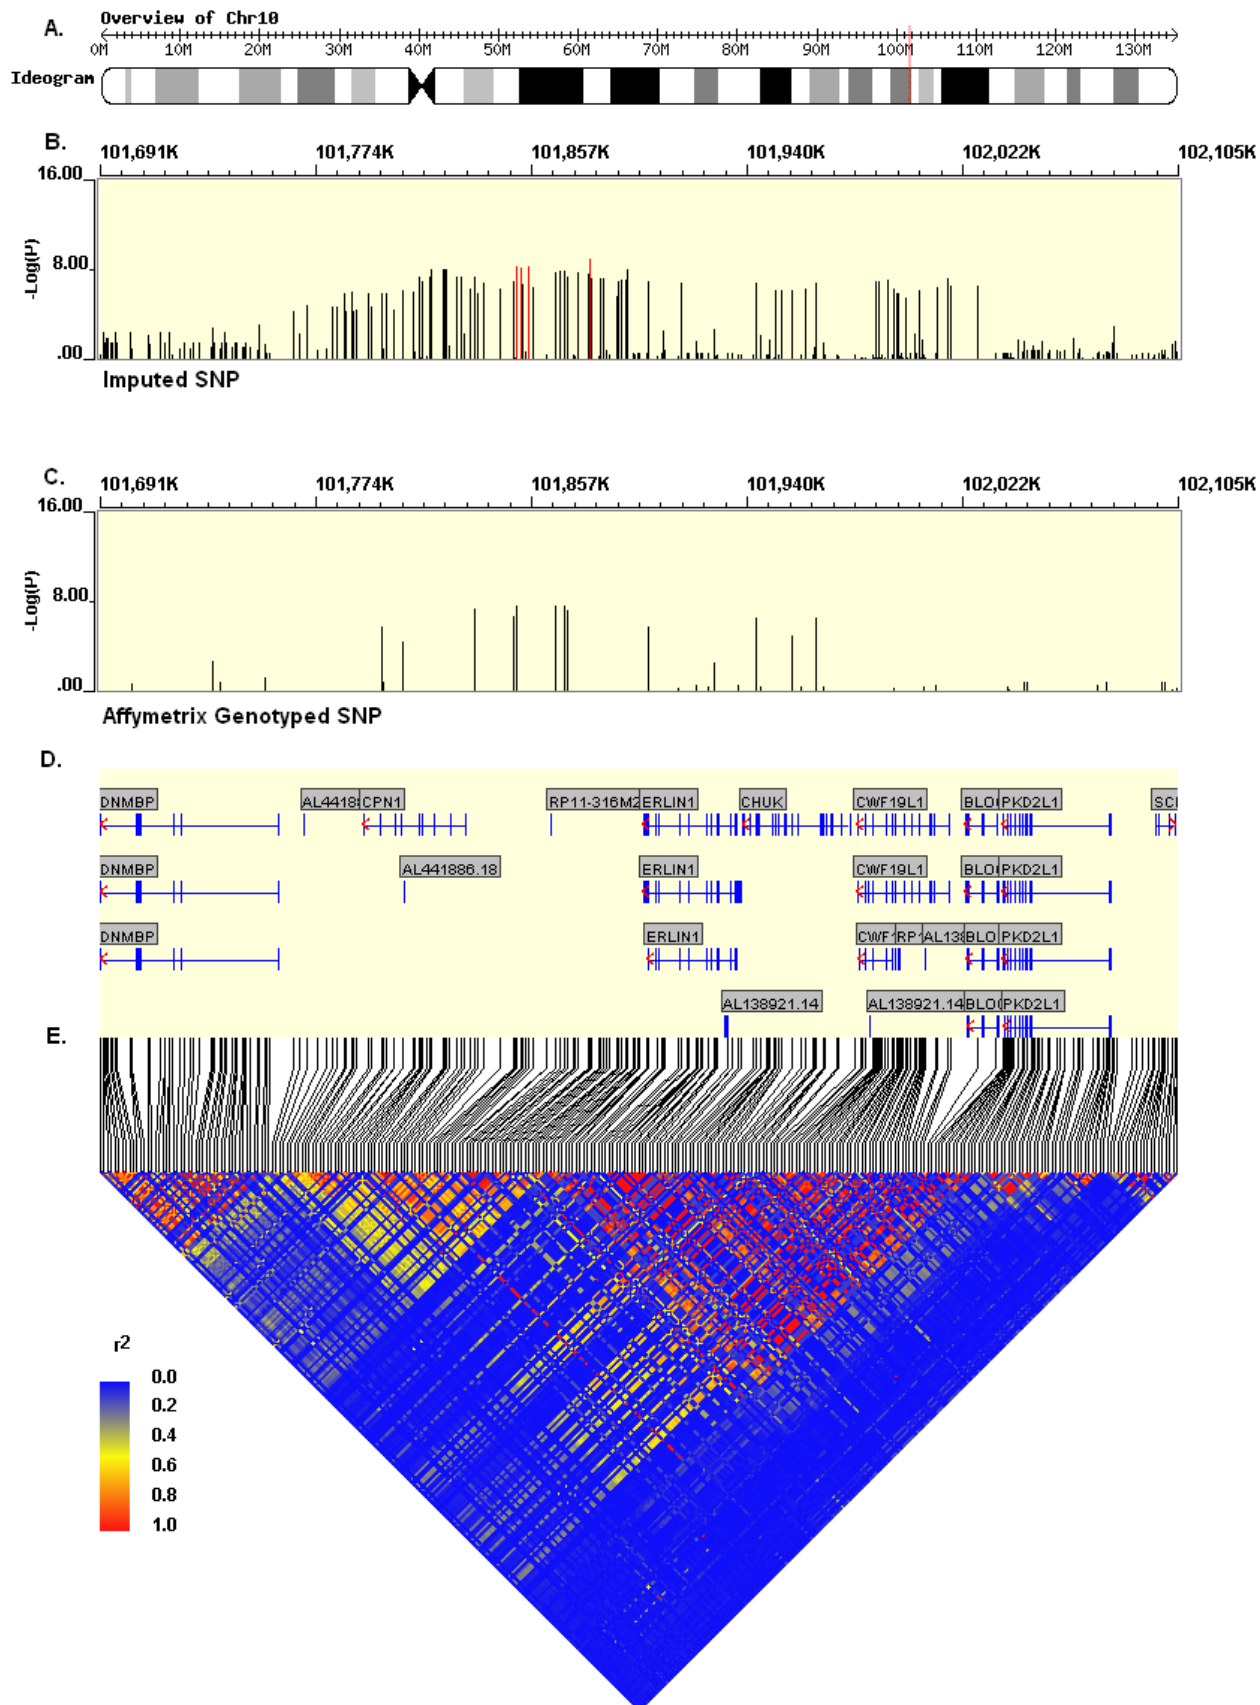



Figure S2. ALT signal region at *PNPLA3-SAMM50* on chromosome 22.

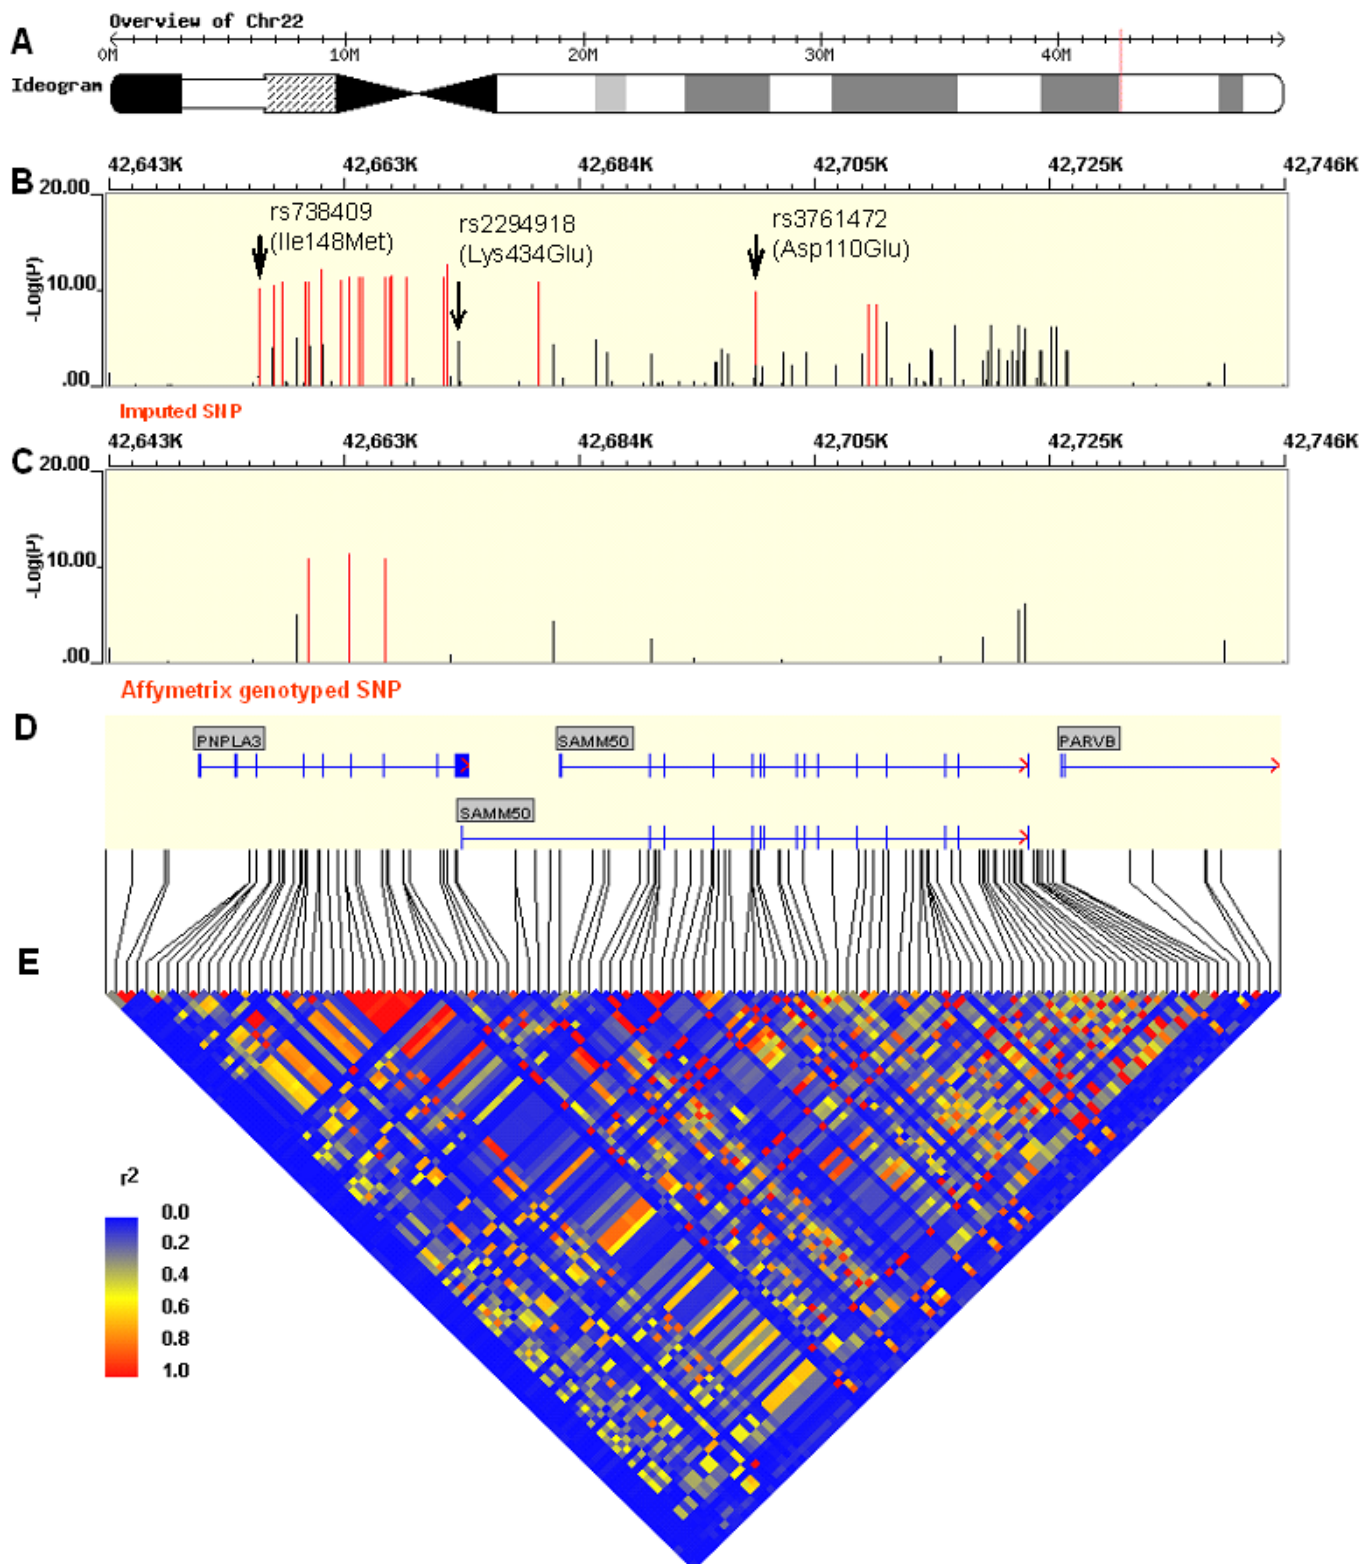

The American Journal of Human Genetics, Volume 83  
 Figure S3. GGT1 signal region at *GGT1* on chromosome 22.

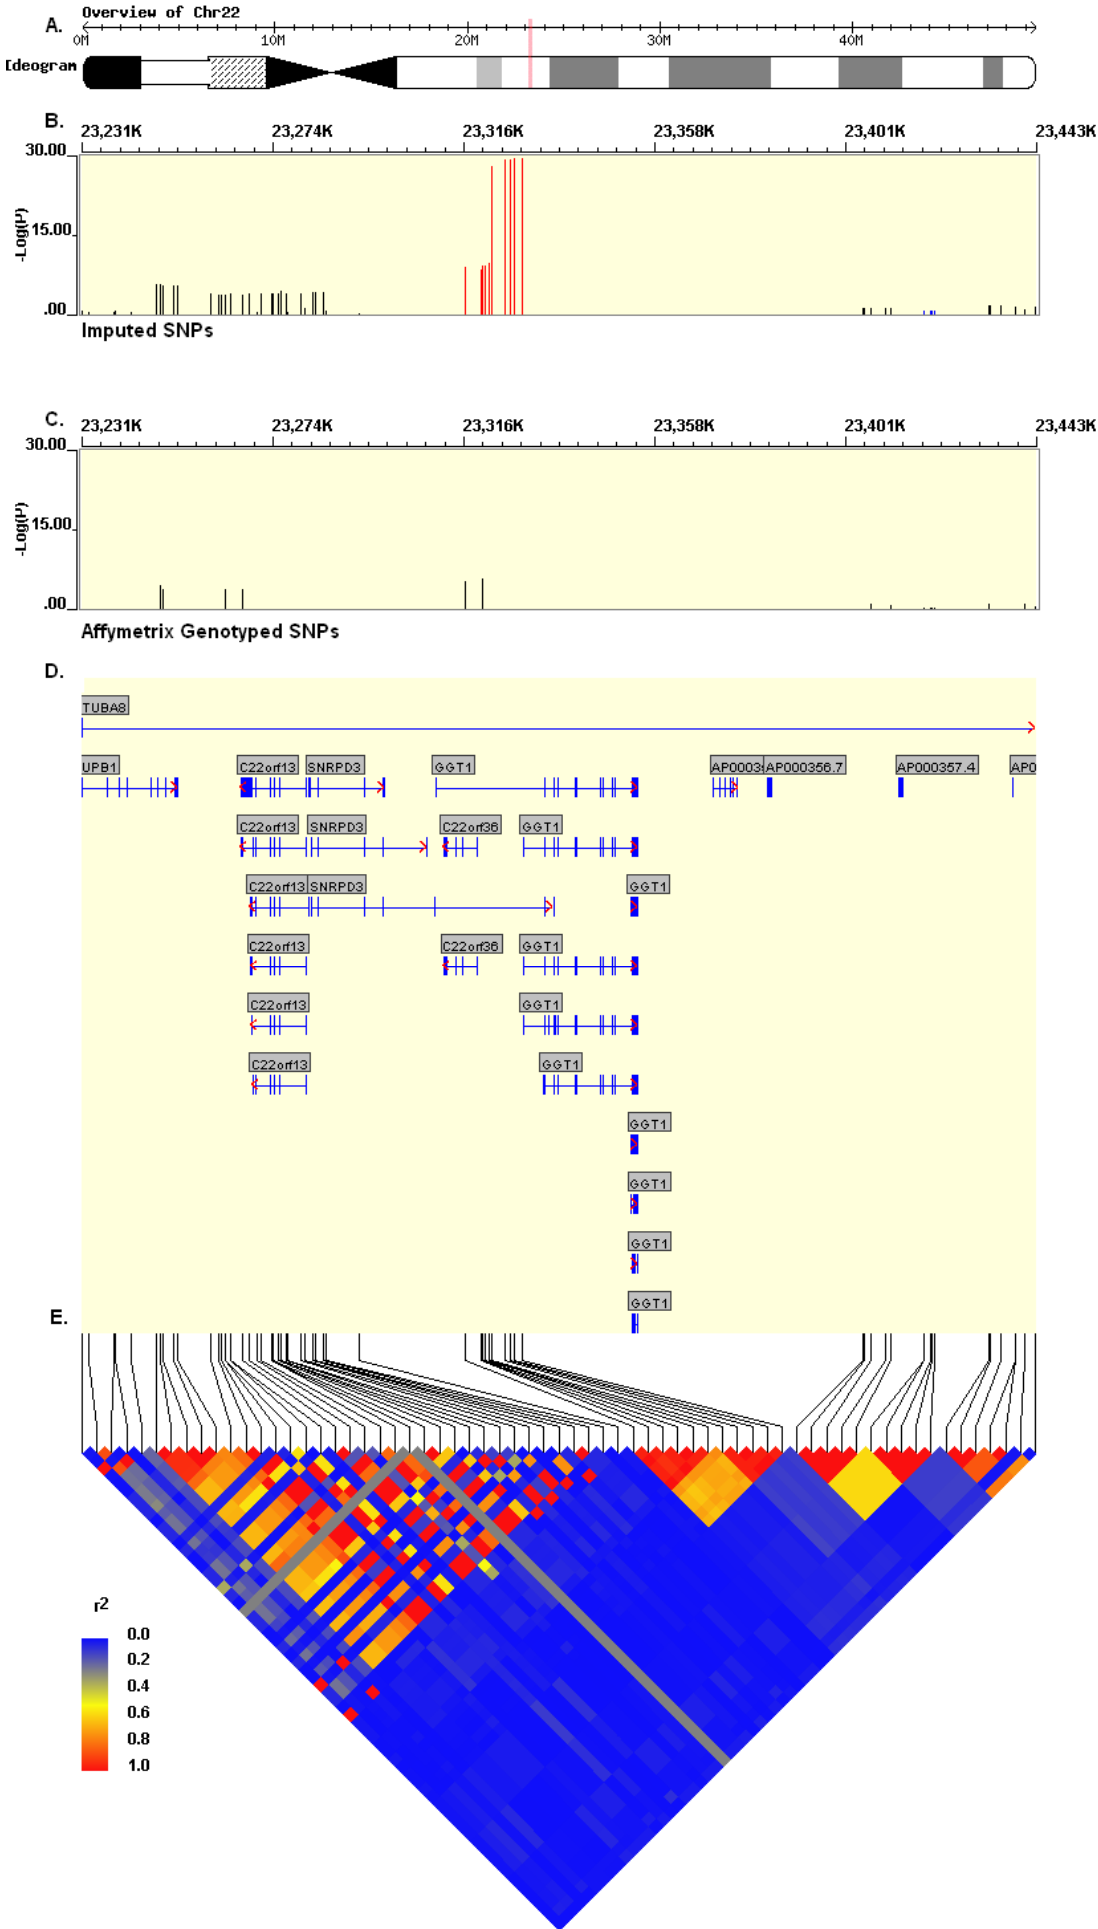

Figure S4. GGT signal region at *HNF1A* on chromosome 12.

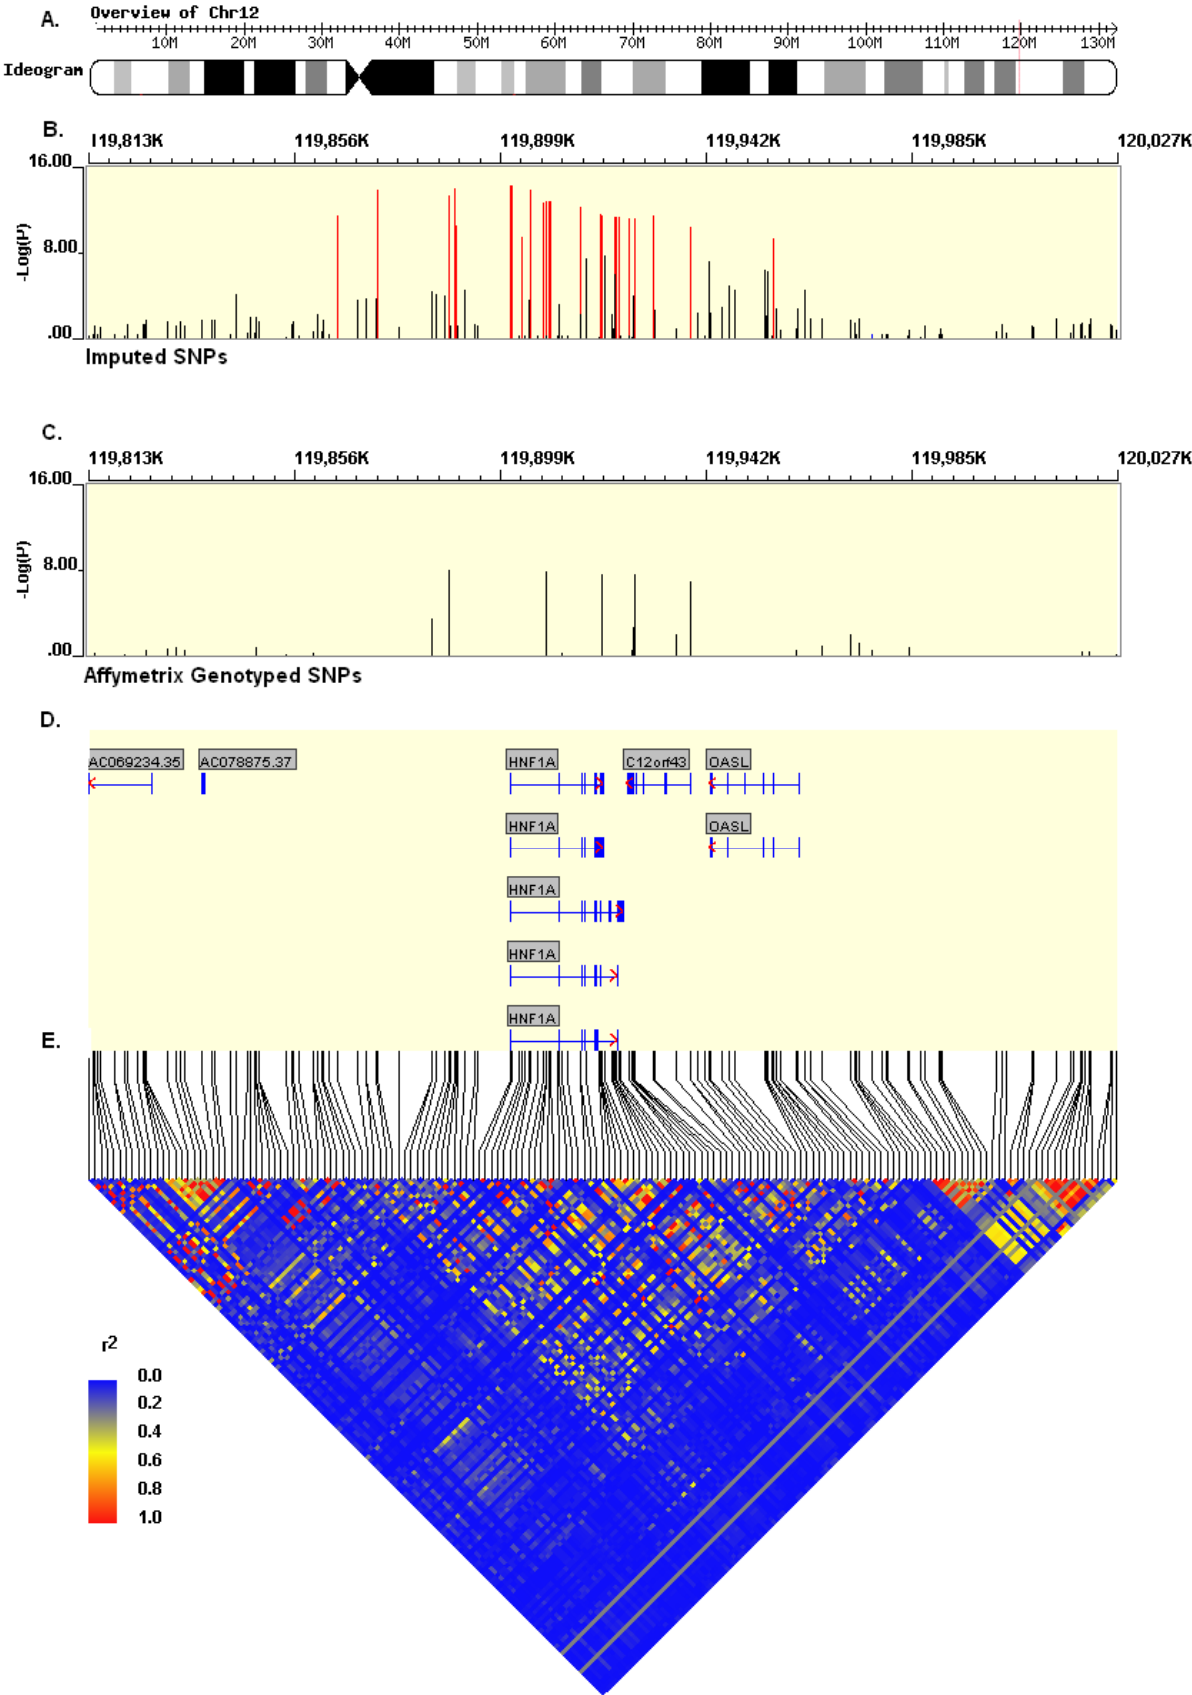

Figure S5. ALP signal region at *ABO* on chromosome 9.

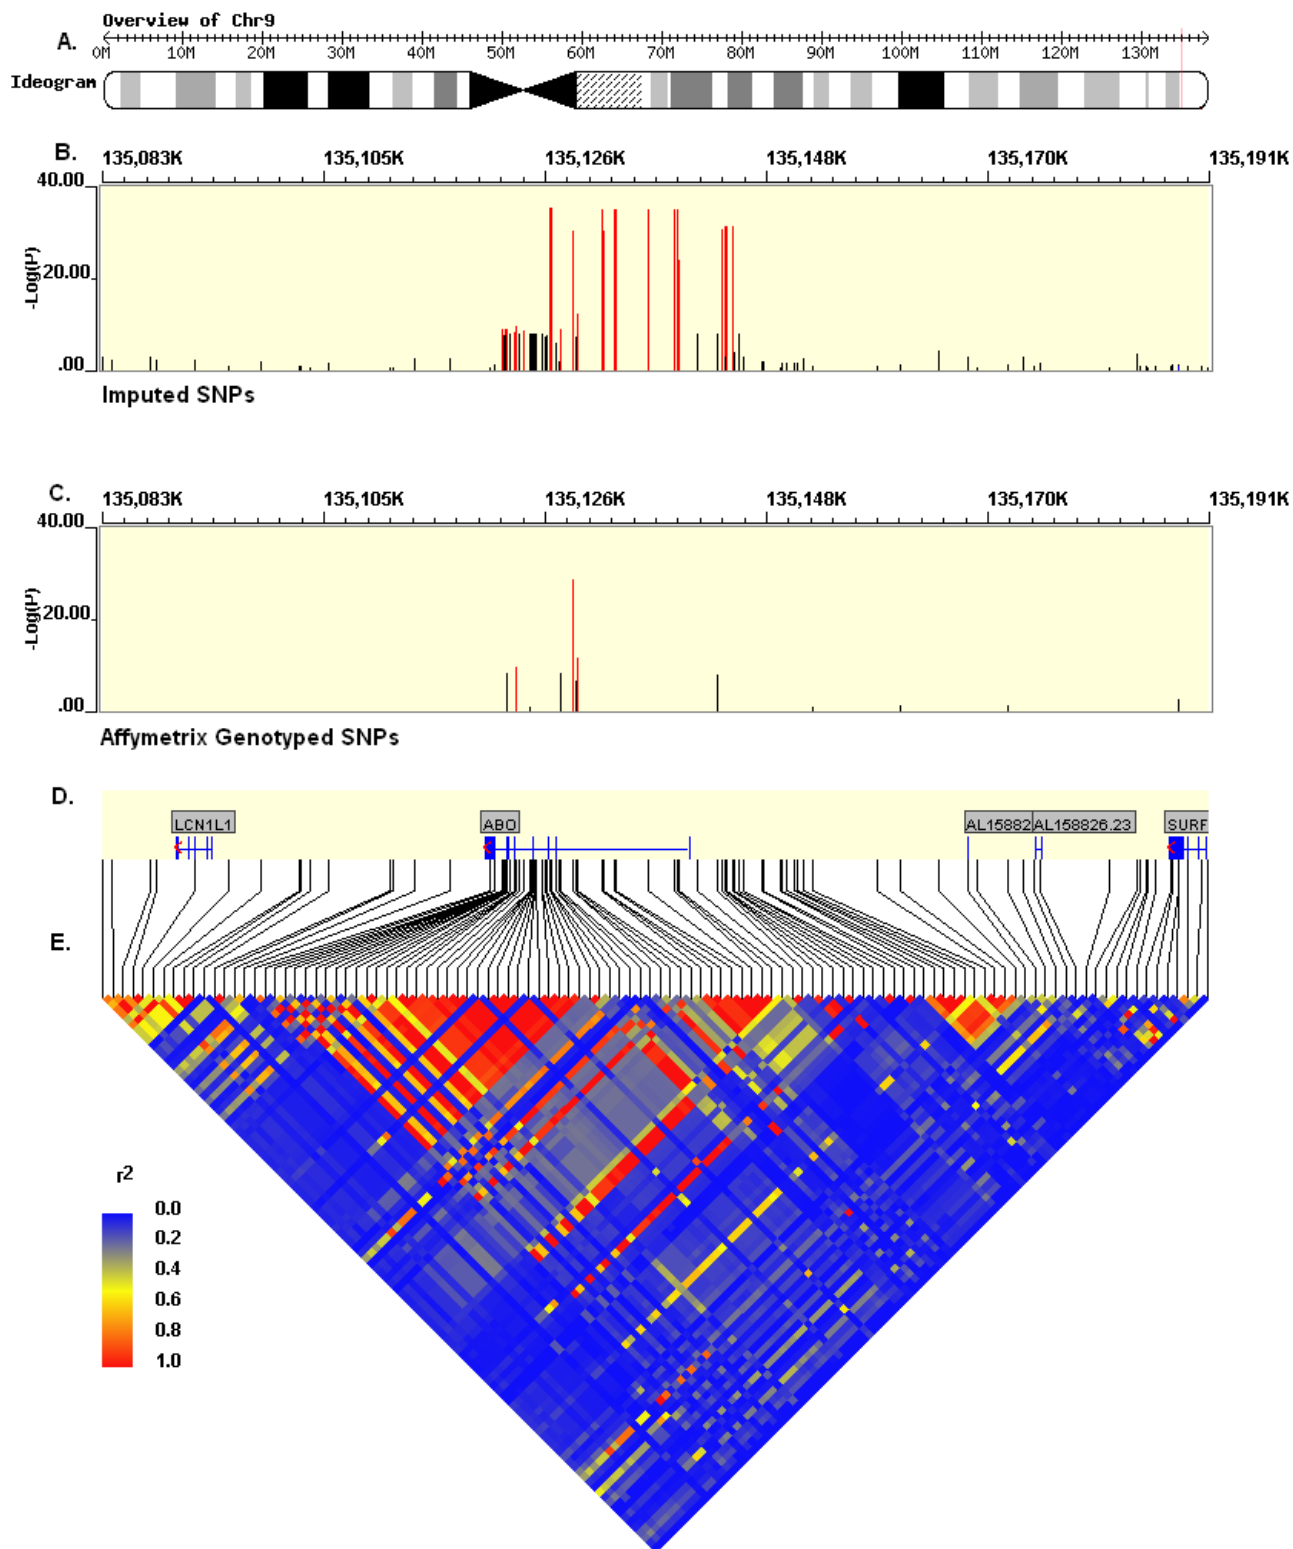

Figure S6. ALP signal at *NBPF3-ALPL* region on chromosome 1.

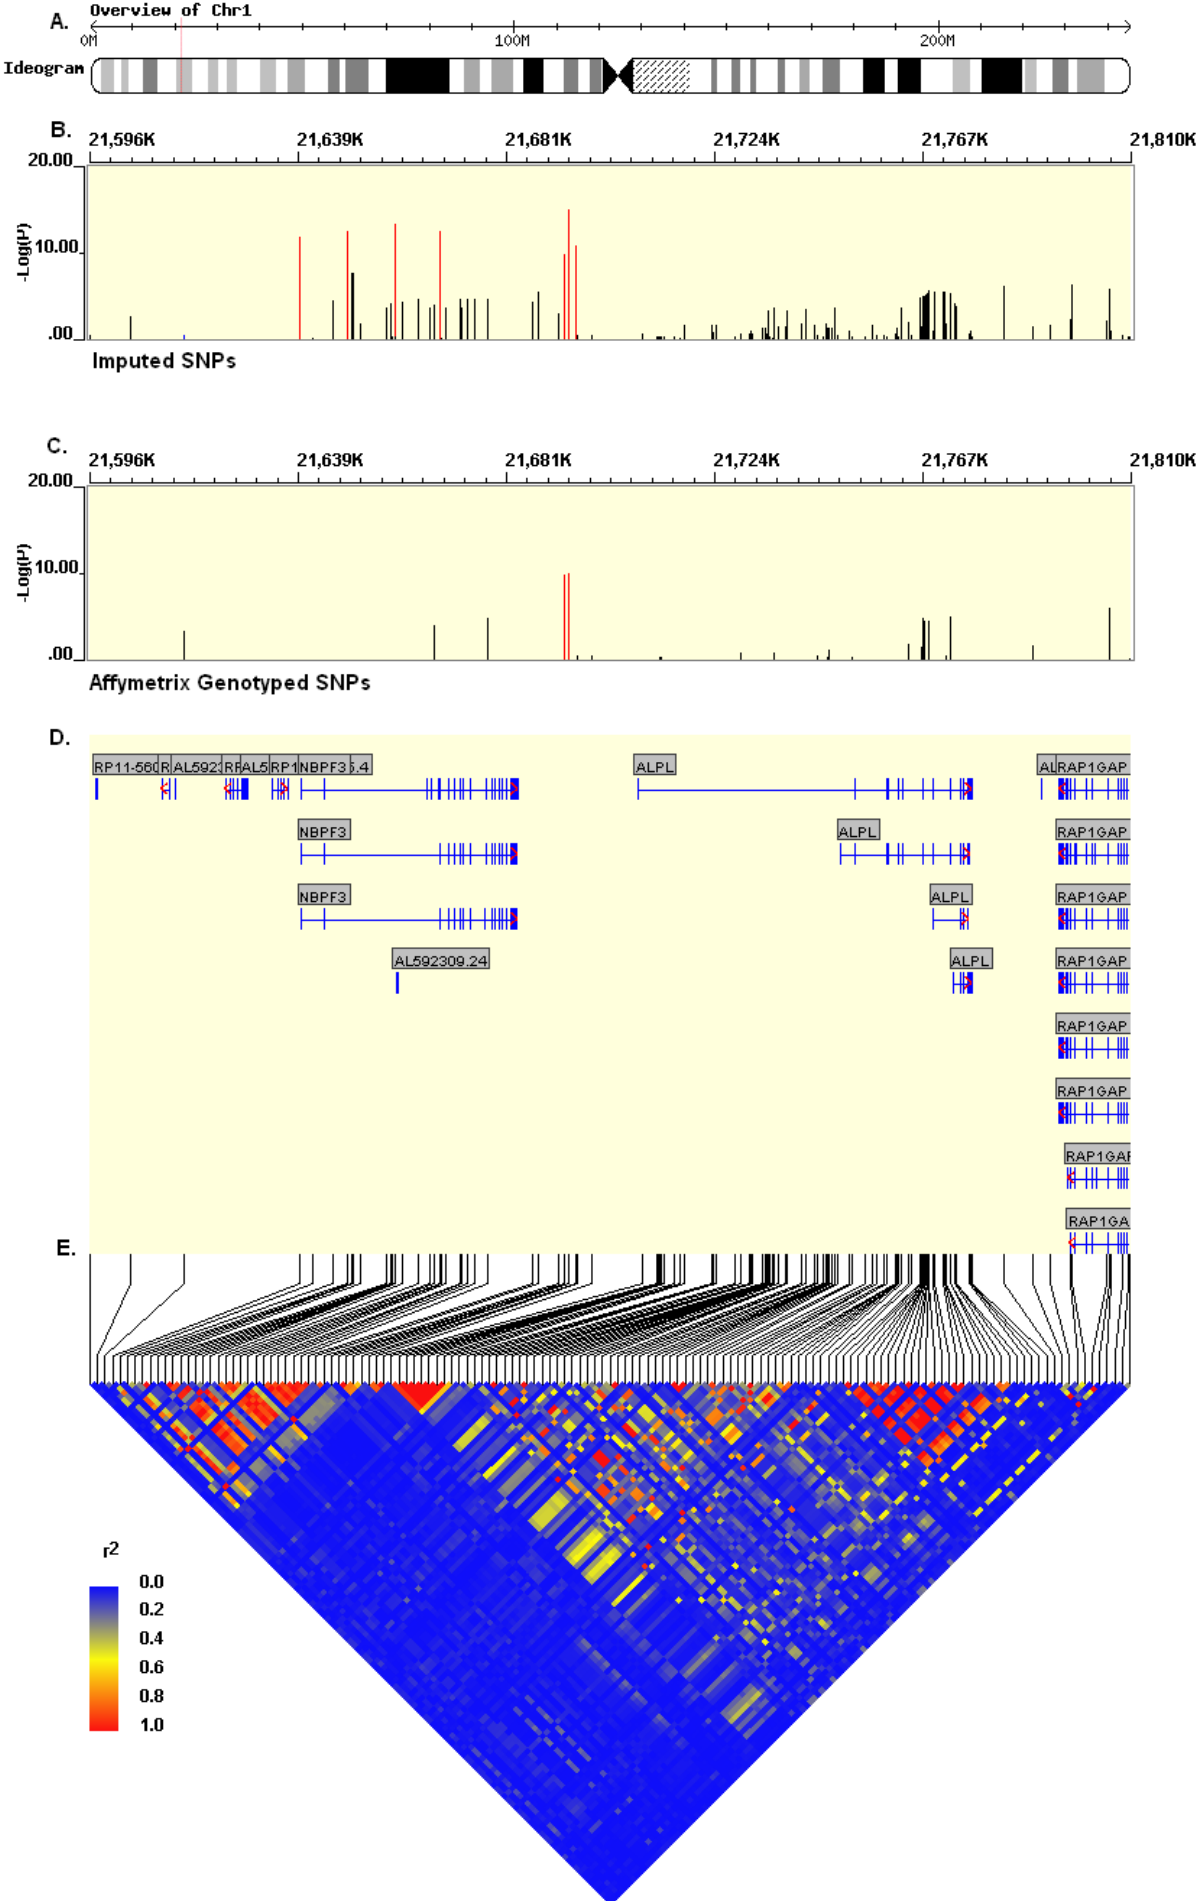



Figure S7. ALP signal at *GPLD1* region on chromosome 6.

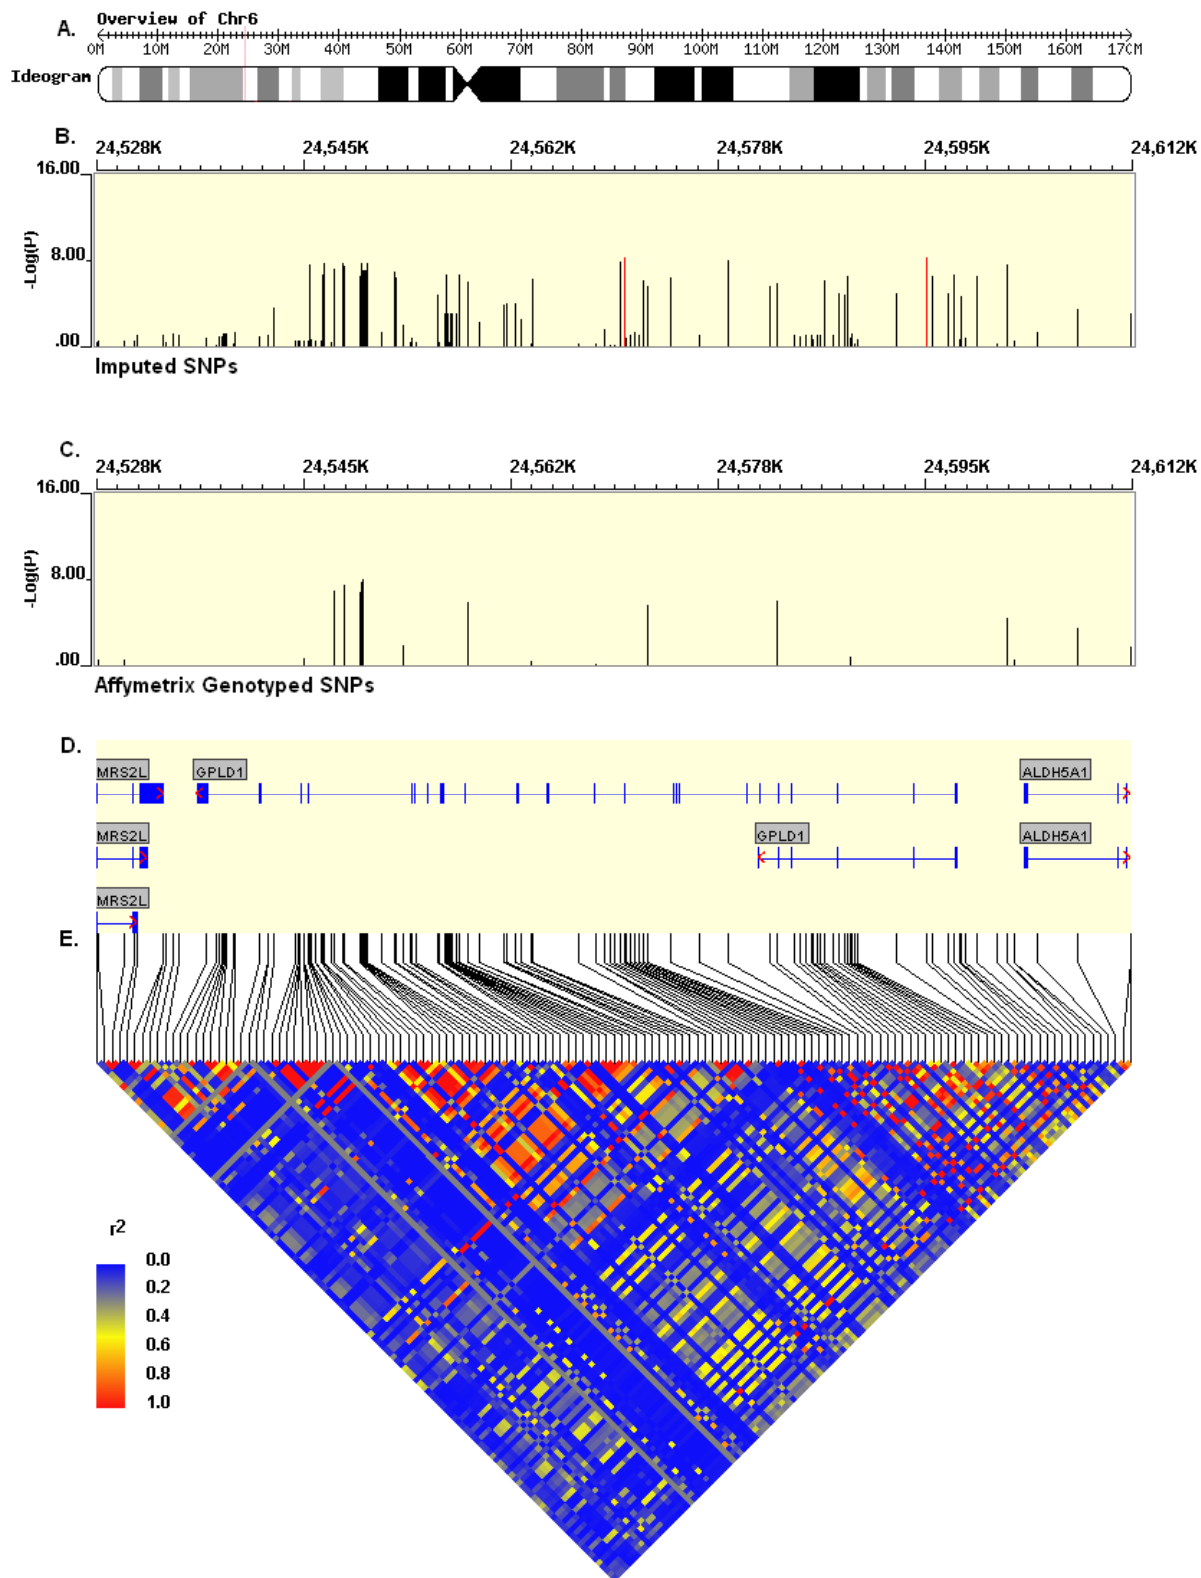

Figure S8. ALP signal at *JMJD1C-REEP3* on chromosome 10.

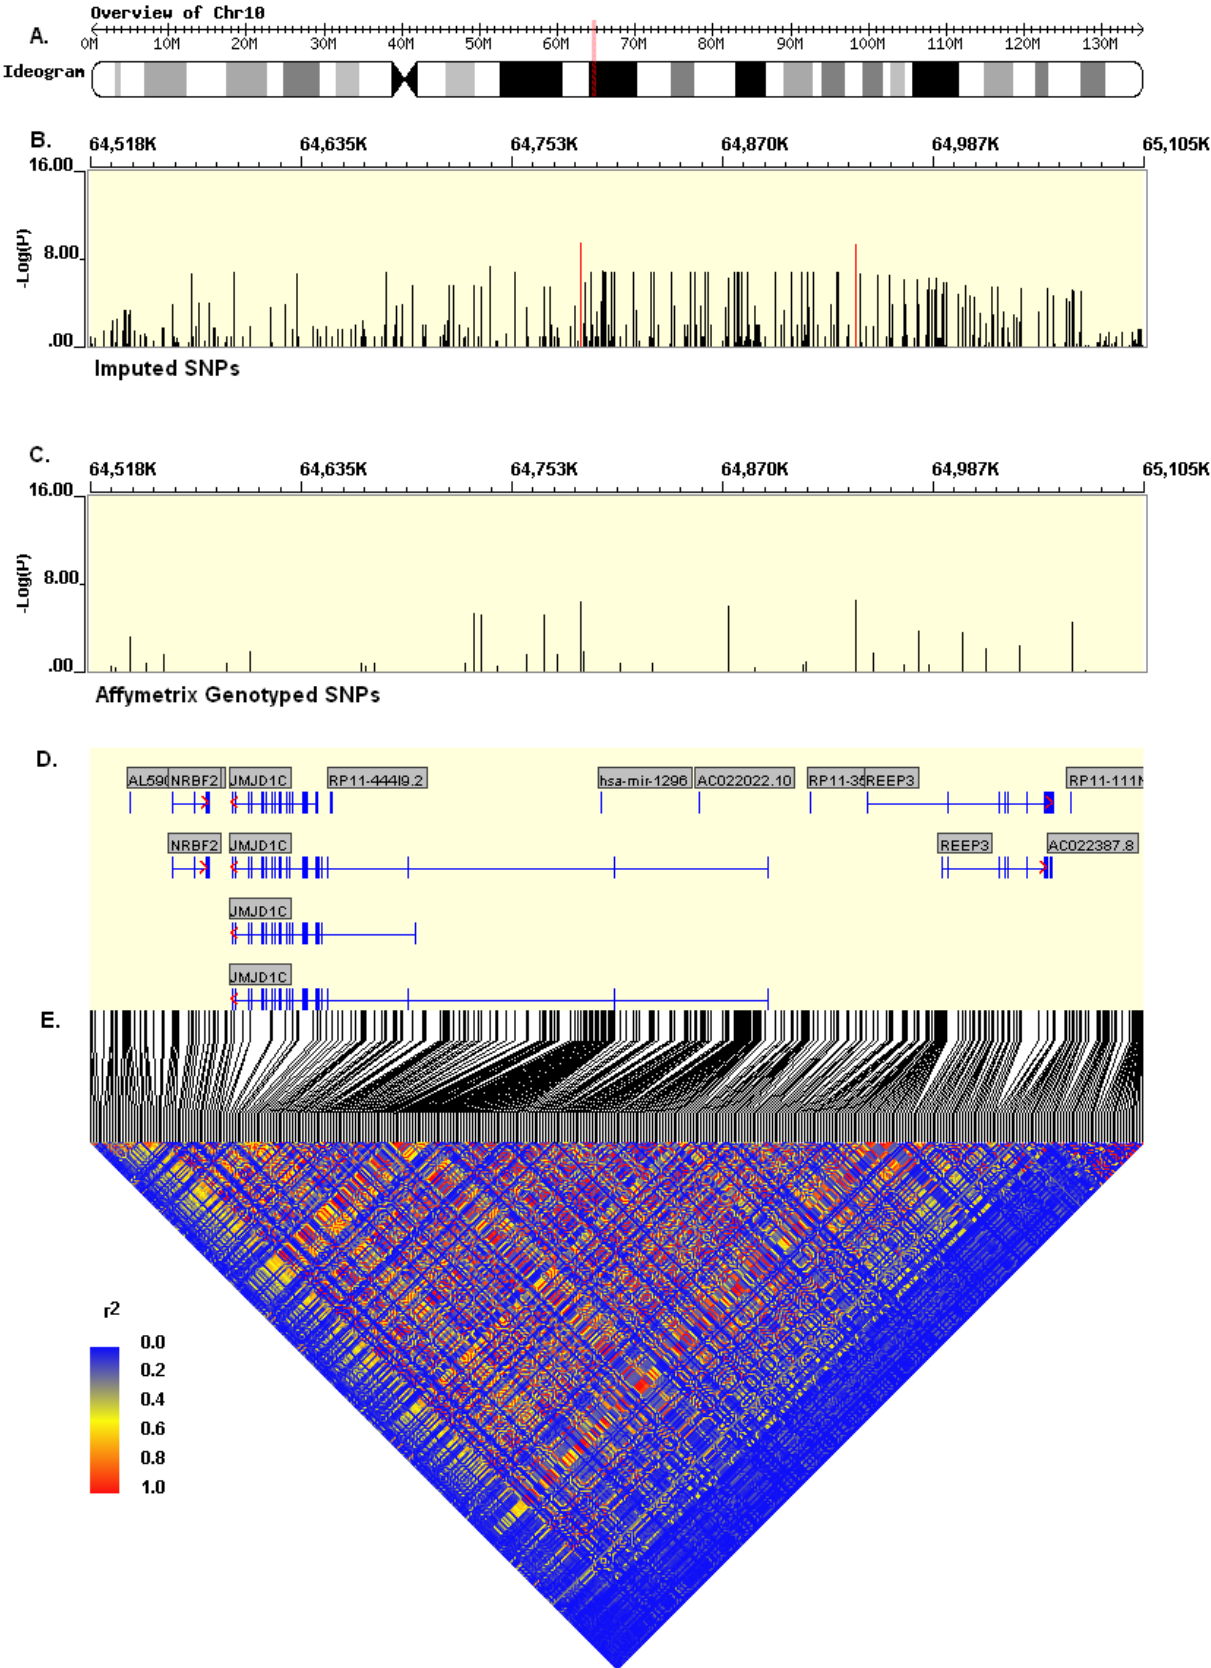

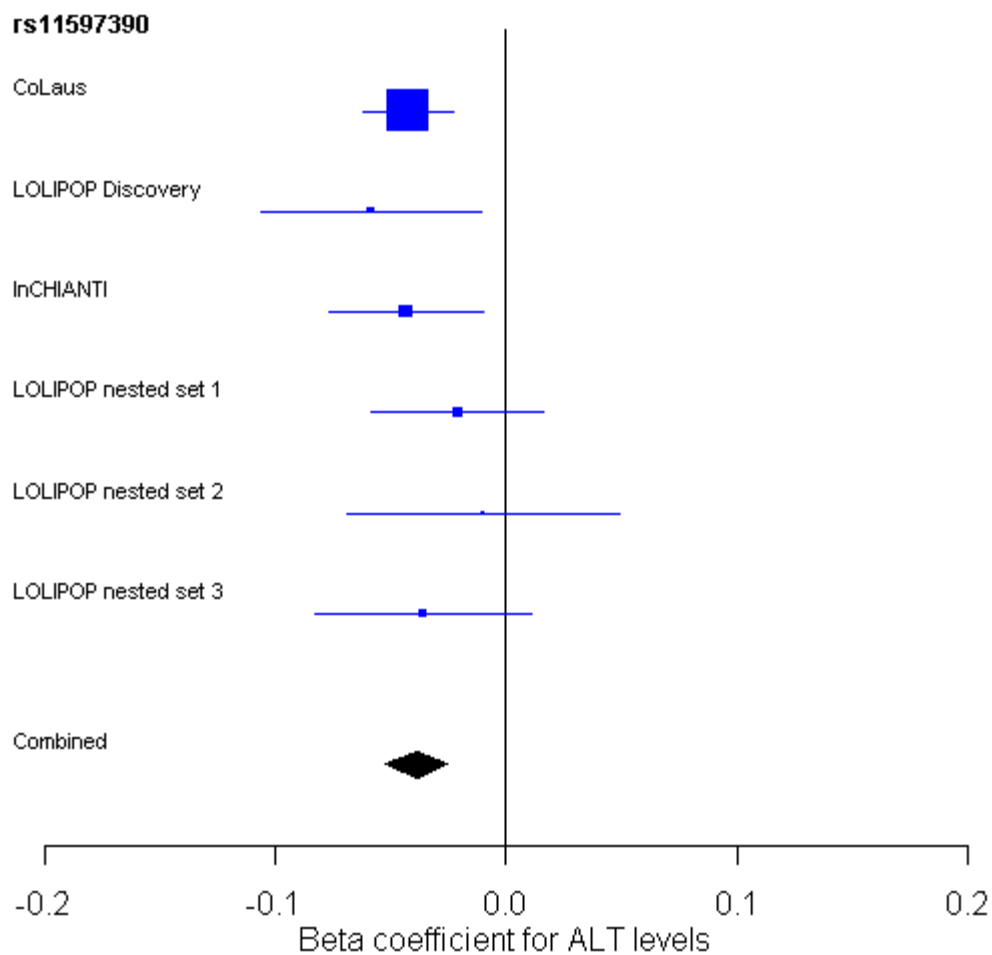

**Figure S9. Association between rs11597390 and plasma ALT levels.** For individual studies  $\beta$ -coefficients are depicted by blue boxes and spanned by 95% CI. Diamond represents combined  $\beta$ -coefficient and the width of the diamond delineate its 95% CI.



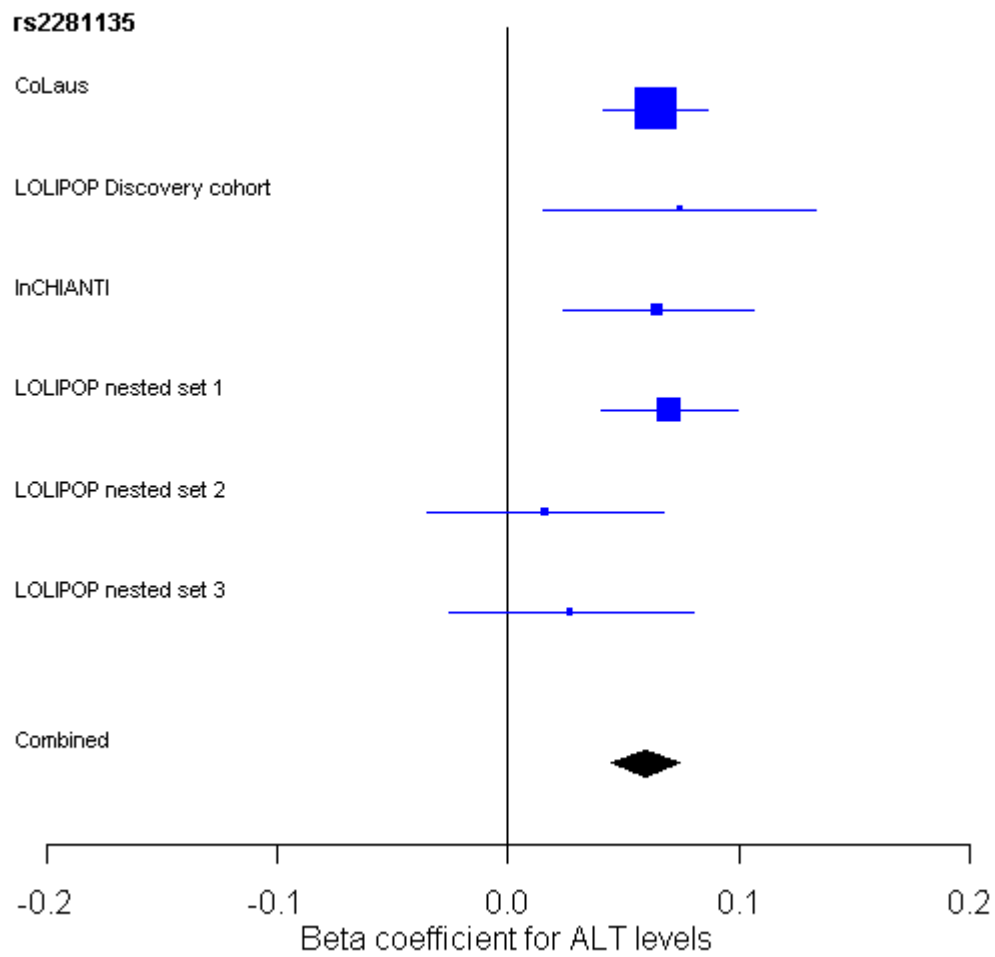

**Figure S10. Association between rs2281135 and plasma ALT levels.**

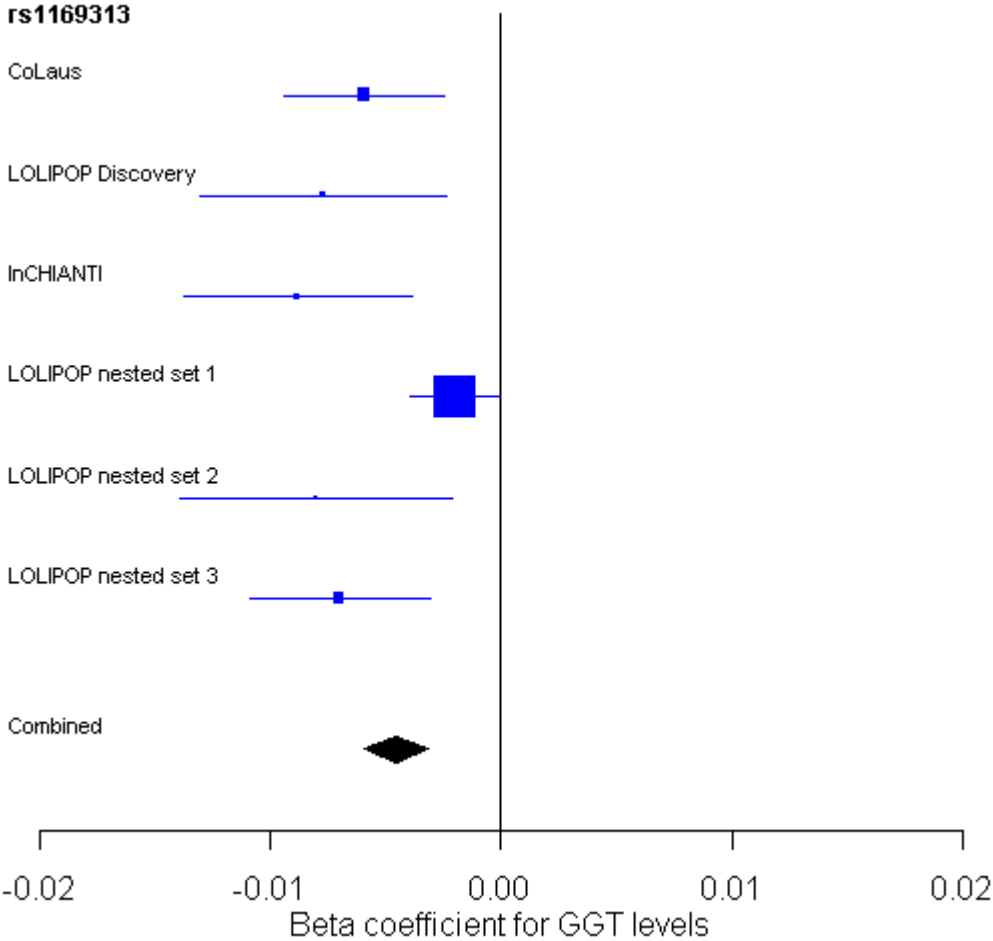

Figure S11. Association between rs1169313 and plasma GGT levels.

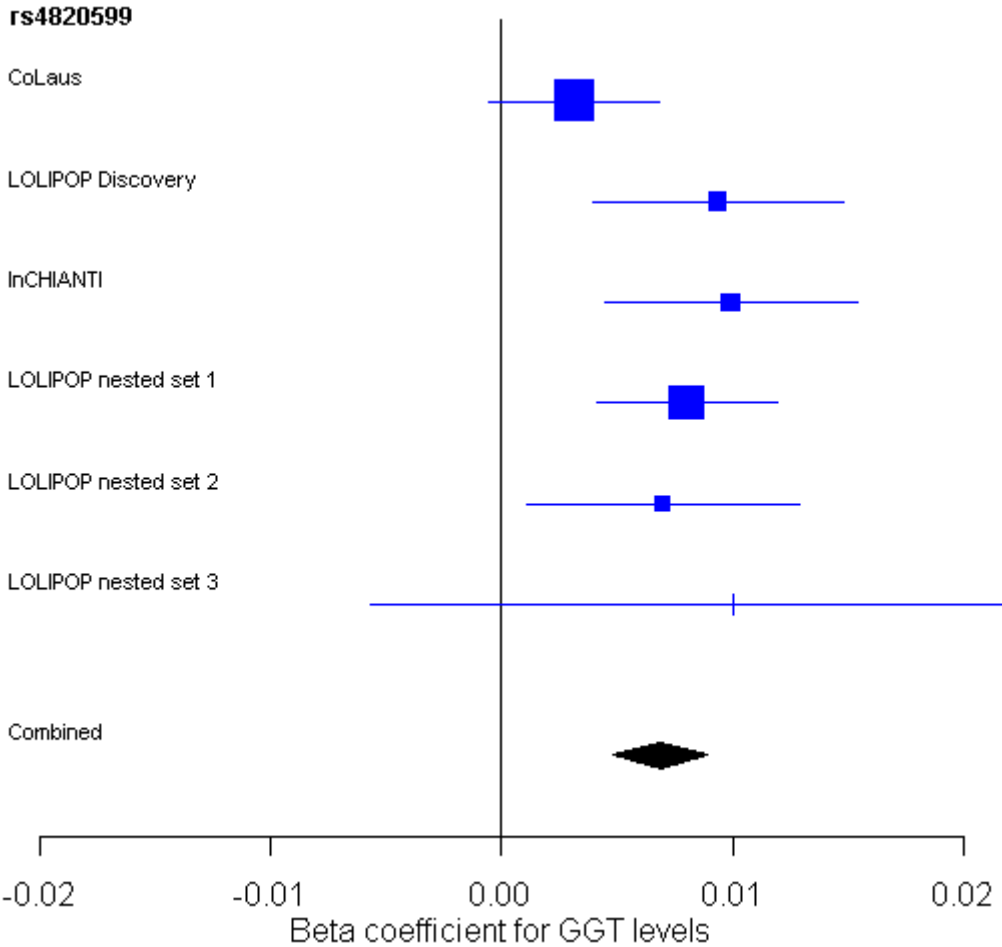

**Figure S12. Association between rs4820599 and plasma GGT levels.**

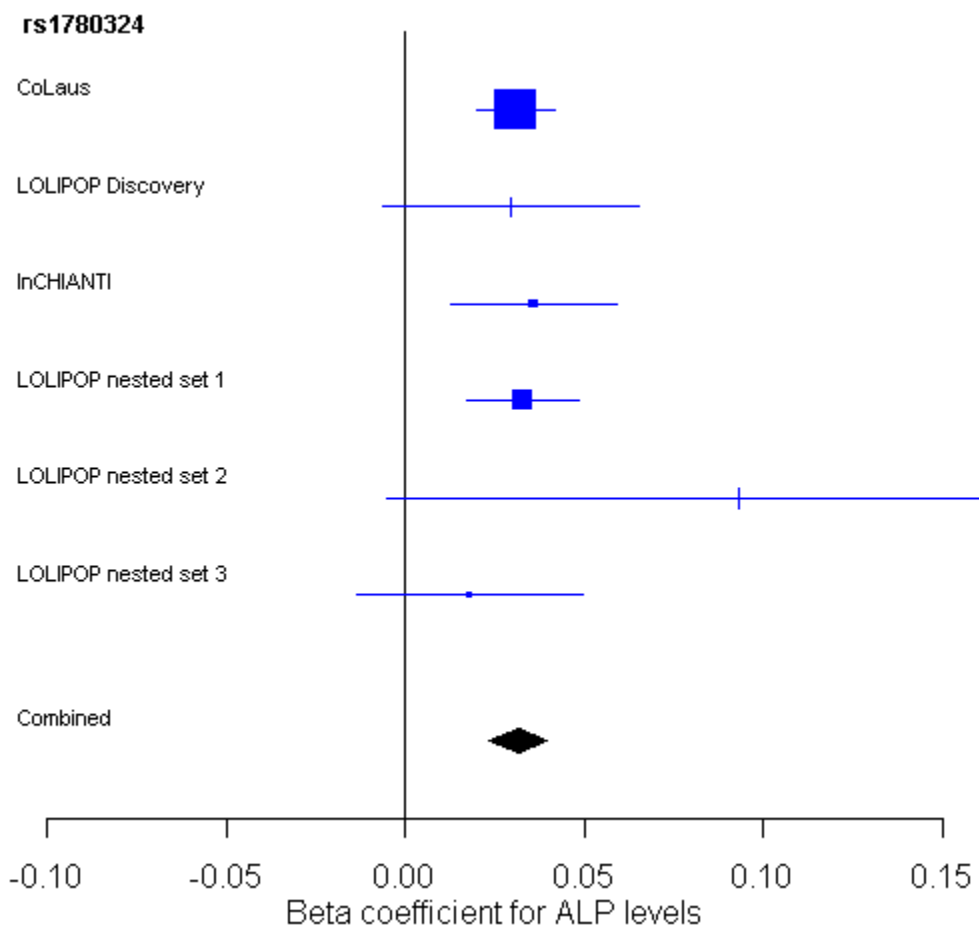

**Figure S13. Association between rs1780324 and plasma ALP levels.**

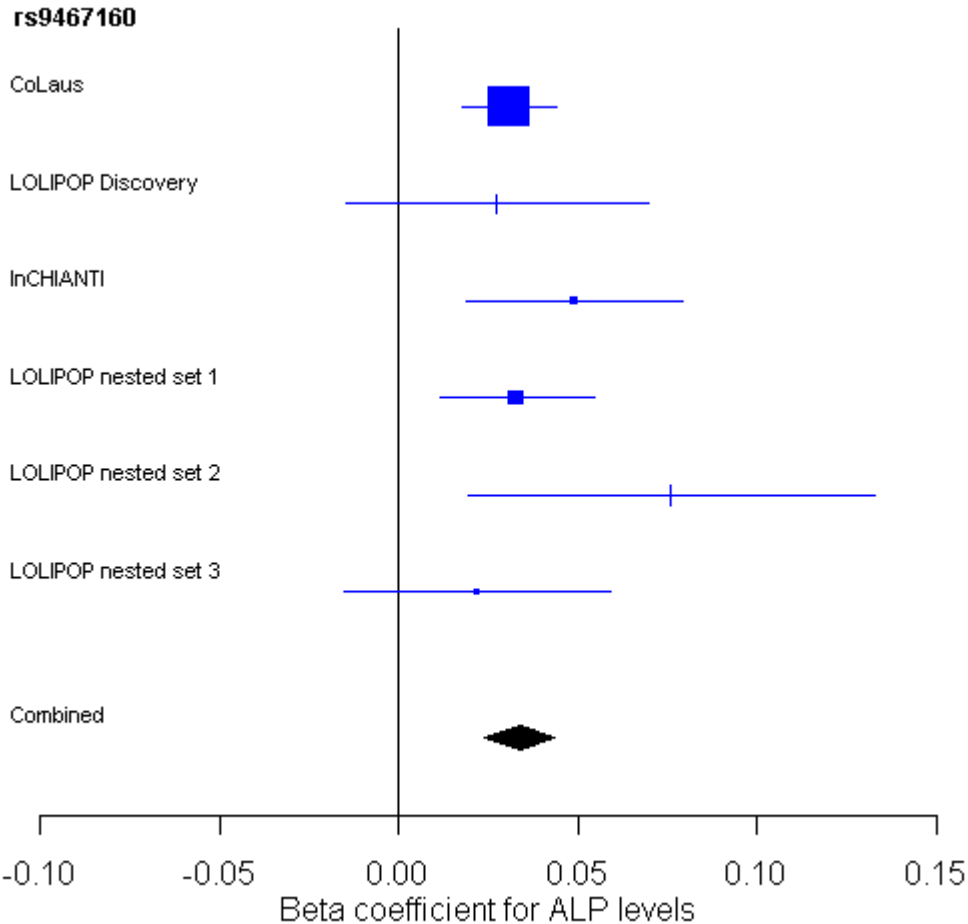

**Figure S14. Association between rs9467160 and plasma ALP levels.**

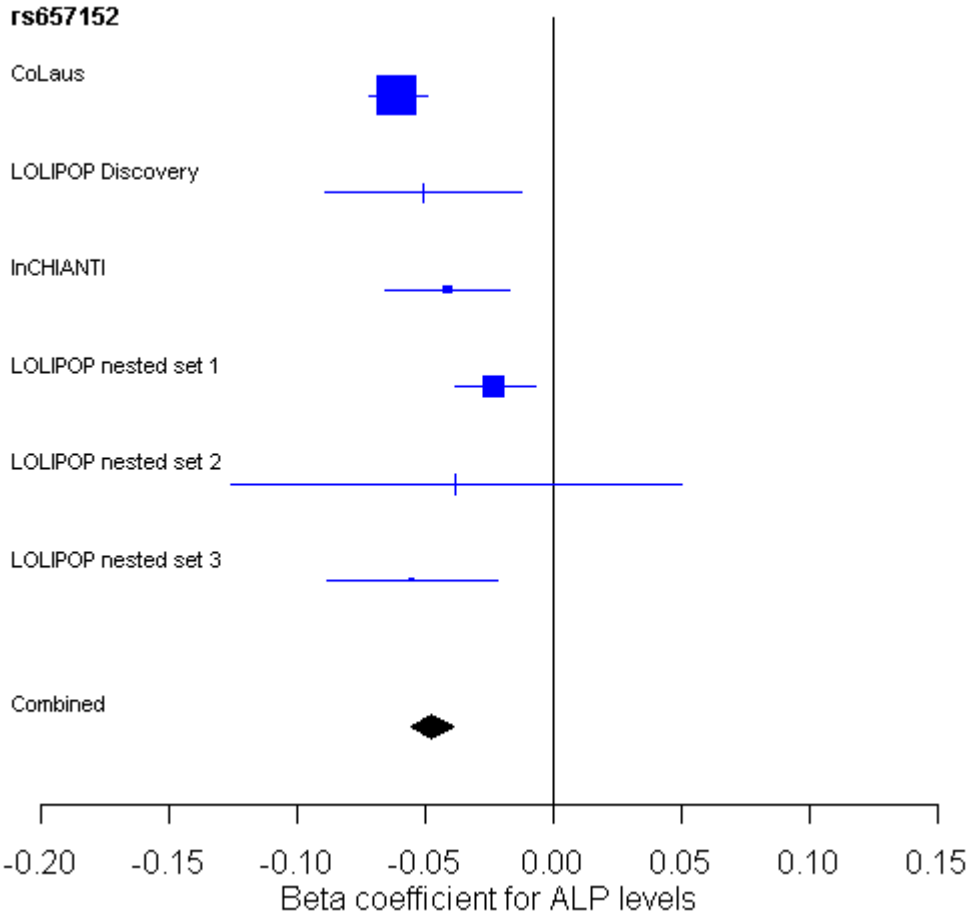

Figure S15. Association between rs657152 and plasma ALP levels.

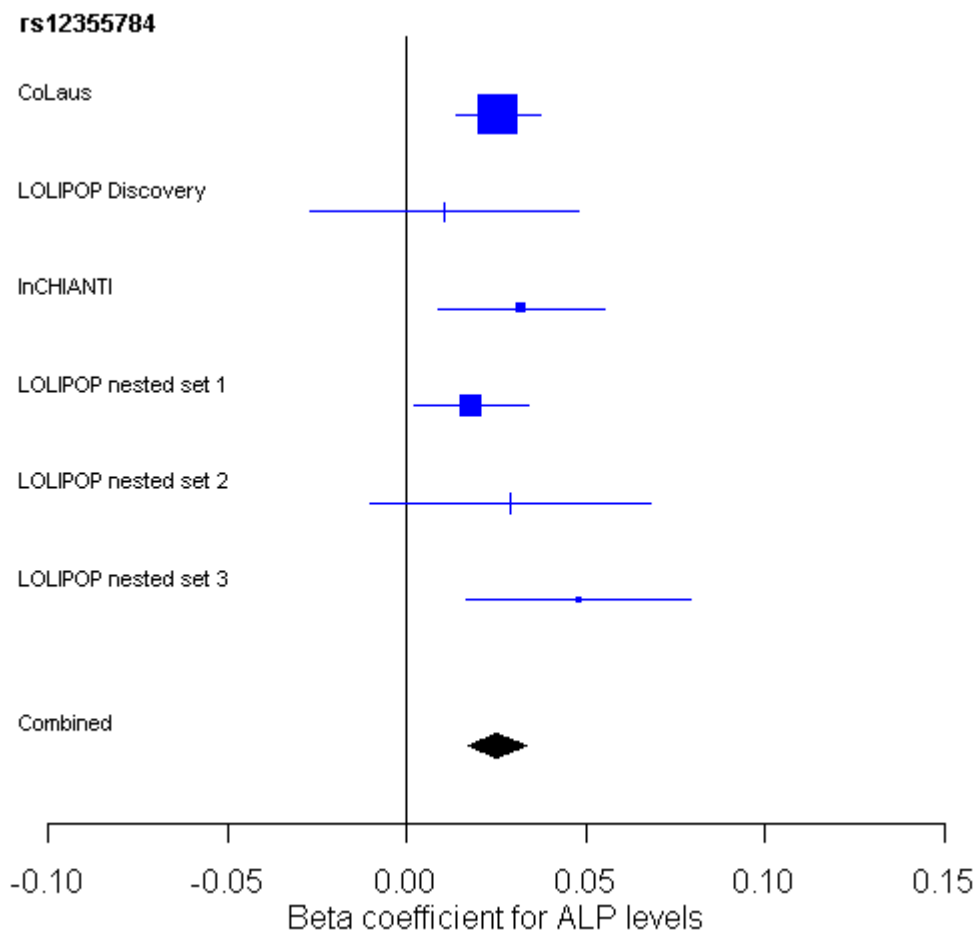

**Figure S16. Association between rs12355784 and plasma ALP levels.**

Supplemental Reference

41. Ge, D., Zhang, K., Need, A. C., Martin, O., Fellay, J., Urban, T. J., Telenti, A., and Goldstein, D. B. (2008) WGAViewer: software for genomic annotation of whole genome association studies. *Genome Res.* 18:640-643
